# Supplementary material for: The origin and distribution of the main oxygen sensing mechanism across metazoans
Source: Front Physiol. 2022 Oct 17;13:977391. doi: 10.3389/fphys.2022.977391 (PMC9618697; doi:10.3389/fphys.2022.977391)
Supplement: Supplementary file 1 [file Table2.XLSX]

## Sheet: Supplementary Table 2
REFSEQ ASSEMBLY	SPECIES	SUPERKINGDOM	KINGDOM	PHYLUM	CLASS	ORDER	FAMILY	GENUS	ASSEMBLY LEVEL	CLASSIFICATION
GCF_000165445.2	Microcebus murinus	Eukaryota	Metazoa	Chordata	Mammalia	Primates	Cheirogaleidae	Microcebus	chromosome	vertebrate
GCF_902635505.1	Sarcophilus harrisii	Eukaryota	Metazoa	Chordata	Mammalia	Dasyuromorphia	Dasyuridae	Sarcophilus	chromosome	vertebrate
GCF_002837175.2	Physeter catodon	Eukaryota	Metazoa	Chordata	Mammalia	Artiodactyla	Physeteridae	Physeter	chromosome	vertebrate
GCF_000002295.2	Monodelphis domestica	Eukaryota	Metazoa	Chordata	Mammalia	Didelphimorphia	Didelphidae	Monodelphis	chromosome	vertebrate
GCF_011064425.1	Rattus rattus	Eukaryota	Metazoa	Chordata	Mammalia	Rodentia	Muridae	Rattus	chromosome	vertebrate
GCF_009834535.1	Camelus ferus	Eukaryota	Metazoa	Chordata	Mammalia	Artiodactyla	Camelidae	Camelus	chromosome	vertebrate
GCF_009663435.1	Callithrix jacchus	Eukaryota	Metazoa	Chordata	Mammalia	Primates	Cebidae	Callithrix	chromosome	vertebrate
GCF_008632895.1	Mastomys coucha	Eukaryota	Metazoa	Chordata	Mammalia	Rodentia	Muridae	Mastomys	chromosome	vertebrate
GCF_008692025.1	Phocoena sinus	Eukaryota	Metazoa	Chordata	Mammalia	Artiodactyla	Phocoenidae	Phocoena	chromosome	vertebrate
GCF_006542625.1	Nomascus leucogenys	Eukaryota	Metazoa	Chordata	Mammalia	Primates	Hylobatidae	Nomascus	chromosome	vertebrate
GCF_000409795.2	Chlorocebus sabaeus	Eukaryota	Metazoa	Chordata	Mammalia	Primates	Cercopithecidae	Chlorocebus	chromosome	vertebrate
GCF_000247795.1	Bos indicus	Eukaryota	Metazoa	Chordata	Mammalia	Artiodactyla	Bovidae	Bos	chromosome	vertebrate
GCF_011762505.1	Arvicanthis niloticus	Eukaryota	Metazoa	Chordata	Mammalia	Rodentia	Muridae	Arvicanthis	chromosome	vertebrate
GCF_002776525.3	Piliocolobus tephrosceles	Eukaryota	Metazoa	Chordata	Mammalia	Primates	Cercopithecidae	Piliocolobus	chromosome	vertebrate
GCF_001704415.1	Capra hircus	Eukaryota	Metazoa	Chordata	Mammalia	Artiodactyla	Bovidae	Capra	chromosome	vertebrate
GCF_003369695.1	Bos indicus x Bos taurus	Eukaryota	Metazoa	Chordata	Mammalia	Artiodactyla	Bovidae	Bos	chromosome	vertebrate
GCF_011762595.1	Tursiops truncatus	Eukaryota	Metazoa	Chordata	Mammalia	Artiodactyla	Delphinidae	Tursiops	chromosome	vertebrate
GCF_004126475.1	Phyllostomus discolor	Eukaryota	Metazoa	Chordata	Mammalia	Chiroptera	Phyllostomidae	Phyllostomus	chromosome	vertebrate
GCF_000001635.26	Mus musculus	Eukaryota	Metazoa	Chordata	Mammalia	Rodentia	Muridae	Mus	chromosome	vertebrate
GCF_008122165.1	Gorilla gorilla gorilla	Eukaryota	Metazoa	Chordata	Mammalia	Primates	Hominidae	Gorilla	chromosome	vertebrate
GCF_003339765.1	Macaca mulatta	Eukaryota	Metazoa	Chordata	Mammalia	Primates	Cercopithecidae	Macaca	chromosome	vertebrate
GCF_004115265.1	Rhinolophus ferrumequinum	Eukaryota	Metazoa	Chordata	Mammalia	Chiroptera	Rhinolophidae	Rhinolophus	chromosome	vertebrate
GCF_002863925.1	Equus caballus	Eukaryota	Metazoa	Chordata	Mammalia	Perissodactyla	Equidae	Equus	chromosome	vertebrate
GCF_002263795.1	Bos taurus	Eukaryota	Metazoa	Chordata	Mammalia	Artiodactyla	Bovidae	Bos	chromosome	vertebrate
GCF_004115215.1	Ornithorhynchus anatinus	Eukaryota	Metazoa	Chordata	Mammalia	Monotremata	Ornithorhynchidae	Ornithorhynchus	chromosome	vertebrate
GCF_000002285.3	Canis lupus familiaris	Eukaryota	Metazoa	Chordata	Mammalia	Carnivora	Canidae	Canis	chromosome	vertebrate
GCF_002007445.1	Ailuropoda melanoleuca	Eukaryota	Metazoa	Chordata	Mammalia	Carnivora	Ursidae	Ailuropoda	chromosome	vertebrate
GCF_002880755.1	Pan troglodytes	Eukaryota	Metazoa	Chordata	Mammalia	Primates	Hominidae	Pan	chromosome	vertebrate
GCF_002742125.1	Ovis aries	Eukaryota	Metazoa	Chordata	Mammalia	Artiodactyla	Bovidae	Ovis	chromosome	vertebrate
GCF_007565055.1	Rhinopithecus roxellana	Eukaryota	Metazoa	Chordata	Mammalia	Primates	Cercopithecidae	Rhinopithecus	chromosome	vertebrate
GCF_002880775.1	Pongo abelii	Eukaryota	Metazoa	Chordata	Mammalia	Primates	Hominidae	Pongo	chromosome	vertebrate
GCF_000003625.3	Oryctolagus cuniculus	Eukaryota	Metazoa	Chordata	Mammalia	Lagomorpha	Leporidae	Oryctolagus	chromosome	vertebrate
GCF_900094665.1	Mus caroli	Eukaryota	Metazoa	Chordata	Mammalia	Rodentia	Muridae	Mus	chromosome	vertebrate
GCF_000803125.2	Camelus dromedarius	Eukaryota	Metazoa	Chordata	Mammalia	Artiodactyla	Camelidae	Camelus	chromosome	vertebrate
GCF_013052645.1	Pan paniscus	Eukaryota	Metazoa	Chordata	Mammalia	Primates	Hominidae	Pan	chromosome	vertebrate
GCF_007474595.1	Lynx canadensis	Eukaryota	Metazoa	Chordata	Mammalia	Carnivora	Felidae	Lynx	chromosome	vertebrate
GCF_006229205.1	Suricata suricatta	Eukaryota	Metazoa	Chordata	Mammalia	Carnivora	Herpestidae	Suricata	chromosome	vertebrate
GCF_000181335.3	Felis catus	Eukaryota	Metazoa	Chordata	Mammalia	Carnivora	Felidae	Felis	chromosome	vertebrate
GCF_000003025.6	Sus scrofa	Eukaryota	Metazoa	Chordata	Mammalia	Artiodactyla	Suidae	Sus	chromosome	vertebrate
GCF_000001405.39	Homo sapiens	Eukaryota	Metazoa	Chordata	Mammalia	Primates	Hominidae	Homo	chromosome	vertebrate
GCF_008728515.1	Papio anubis	Eukaryota	Metazoa	Chordata	Mammalia	Primates	Cercopithecidae	Papio	chromosome	vertebrate
GCF_000317375.1	Microtus ochrogaster	Eukaryota	Metazoa	Chordata	Mammalia	Rodentia	Cricetidae	Microtus	chromosome	vertebrate
GCF_009829155.1	Mustela erminea	Eukaryota	Metazoa	Chordata	Mammalia	Carnivora	Mustelidae	Mustela	chromosome	vertebrate
GCF_003255815.1	Theropithecus gelada	Eukaryota	Metazoa	Chordata	Mammalia	Primates	Cercopithecidae	Theropithecus	chromosome	vertebrate
GCF_000364345.1	Macaca fascicularis	Eukaryota	Metazoa	Chordata	Mammalia	Primates	Cercopithecidae	Macaca	chromosome	vertebrate
GCF_000001895.5	Rattus norvegicus	Eukaryota	Metazoa	Chordata	Mammalia	Rodentia	Muridae	Rattus	chromosome	vertebrate
GCF_900095145.1	Mus pahari	Eukaryota	Metazoa	Chordata	Mammalia	Rodentia	Muridae	Mus	chromosome	vertebrate
GCF_006547405.1	Globicephala melas	Eukaryota	Metazoa	Chordata	Mammalia	Artiodactyla	Delphinidae	Globicephala	scaffold	vertebrate
GCF_000956105.1	Propithecus coquereli	Eukaryota	Metazoa	Chordata	Mammalia	Primates	Indriidae	Propithecus	scaffold	vertebrate
GCF_000164845.3	Vicugna pacos	Eukaryota	Metazoa	Chordata	Mammalia	Artiodactyla	Camelidae	Vicugna	scaffold	vertebrate
GCF_000299155.1	Elephantulus edwardii	Eukaryota	Metazoa	Chordata	Mammalia	Macroscelidea	Macroscelididae	Elephantulus	scaffold	vertebrate
GCF_009764315.1	Trachypithecus francoisi	Eukaryota	Metazoa	Chordata	Mammalia	Primates	Cercopithecidae	Trachypithecus	scaffold	vertebrate
GCF_000687225.1	Ursus maritimus	Eukaryota	Metazoa	Chordata	Mammalia	Carnivora	Ursidae	Ursus	scaffold	vertebrate
GCF_000349705.1	Leptonychotes weddellii	Eukaryota	Metazoa	Chordata	Mammalia	Carnivora	Phocidae	Leptonychotes	scaffold	vertebrate
GCF_000151885.1	Dipodomys ordii	Eukaryota	Metazoa	Chordata	Mammalia	Rodentia	Heteromyidae	Dipodomys	scaffold	vertebrate
GCF_000327345.1	Myotis davidii	Eukaryota	Metazoa	Chordata	Mammalia	Chiroptera	Vespertilionidae	Myotis	scaffold	vertebrate
GCF_000412655.1	Myotis brandtii	Eukaryota	Metazoa	Chordata	Mammalia	Chiroptera	Vespertilionidae	Myotis	scaffold	vertebrate
GCF_000952055.2	Aotus nancymaae	Eukaryota	Metazoa	Chordata	Mammalia	Primates	Aotidae	Aotus	scaffold	vertebrate
GCF_000493695.1	Balaenoptera acutorostrata scammoni	Eukaryota	Metazoa	Chordata	Mammalia	Artiodactyla	Balaenopteridae	Balaenoptera	scaffold	vertebrate
GCF_004348235.1	Phoca vitulina	Eukaryota	Metazoa	Chordata	Mammalia	Carnivora	Phocidae	Phoca	scaffold	vertebrate
GCF_010015895.1	Lontra canadensis	Eukaryota	Metazoa	Chordata	Mammalia	Carnivora	Mustelidae	Lontra	scaffold	vertebrate
GCF_001685135.1	Manis javanica	Eukaryota	Metazoa	Chordata	Mammalia	Pholidota	Manidae	Manis	scaffold	vertebrate
GCF_002201575.1	Neomonachus schauinslandi	Eukaryota	Metazoa	Chordata	Mammalia	Carnivora	Phocidae	Neomonachus	scaffold	vertebrate
GCF_000298275.1	Orycteropus afer afer	Eukaryota	Metazoa	Chordata	Mammalia	Tubulidentata	Orycteropodidae	Orycteropus	scaffold	vertebrate
GCF_003265705.1	Callorhinus ursinus	Eukaryota	Metazoa	Chordata	Mammalia	Carnivora	Otariidae	Callorhinus	scaffold	vertebrate
GCF_000331955.2	Orcinus orca	Eukaryota	Metazoa	Chordata	Mammalia	Artiodactyla	Delphinidae	Orcinus	scaffold	vertebrate
GCF_001466805.2	Rousettus aegyptiacus	Eukaryota	Metazoa	Chordata	Mammalia	Chiroptera	Pteropodidae	Rousettus	scaffold	vertebrate
GCF_000280705.1	Jaculus jaculus	Eukaryota	Metazoa	Chordata	Mammalia	Rodentia	Dipodidae	Jaculus	scaffold	vertebrate
GCF_011800145.1	Mirounga leonina	Eukaryota	Metazoa	Chordata	Mammalia	Carnivora	Phocidae	Mirounga	scaffold	vertebrate
GCF_000349665.1	Mesocricetus auratus	Eukaryota	Metazoa	Chordata	Mammalia	Rodentia	Cricetidae	Mesocricetus	scaffold	vertebrate
GCF_000208655.1	Dasypus novemcinctus	Eukaryota	Metazoa	Chordata	Mammalia	Cingulata	Dasypodidae	Dasypus	scaffold	vertebrate
GCF_009828535.2	Hylobates moloch	Eukaryota	Metazoa	Chordata	Mammalia	Primates	Hylobatidae	Hylobates	scaffold	vertebrate
GCF_003327715.1	Puma concolor	Eukaryota	Metazoa	Chordata	Mammalia	Carnivora	Felidae	Puma	scaffold	vertebrate
GCF_000151735.1	Cavia porcellus	Eukaryota	Metazoa	Chordata	Mammalia	Rodentia	Caviidae	Cavia	scaffold	vertebrate
GCF_000215625.1	Mustela putorius furo	Eukaryota	Metazoa	Chordata	Mammalia	Carnivora	Mustelidae	Mustela	scaffold	vertebrate
GCF_001595765.1	Miniopterus natalensis	Eukaryota	Metazoa	Chordata	Mammalia	Chiroptera	Vespertilionidae	Miniopterus	scaffold	vertebrate
GCF_003584765.1	Ursus arctos horribilis	Eukaryota	Metazoa	Chordata	Mammalia	Carnivora	Ursidae	Ursus	scaffold	vertebrate
GCF_004664715.1	Peromyscus leucopus	Eukaryota	Metazoa	Chordata	Mammalia	Rodentia	Cricetidae	Peromyscus	scaffold	vertebrate
GCF_000321225.1	Odobenus rosmarus divergens	Eukaryota	Metazoa	Chordata	Mammalia	Carnivora	Odobenidae	Odobenus	scaffold	vertebrate
GCF_000298355.1	Bos mutus	Eukaryota	Metazoa	Chordata	Mammalia	Artiodactyla	Bovidae	Bos	scaffold	vertebrate
GCF_000296755.1	Erinaceus europaeus	Eukaryota	Metazoa	Chordata	Mammalia	Eulipotyphla	Erinaceidae	Erinaceus	scaffold	vertebrate
GCF_004028035.1	Eumetopias jubatus	Eukaryota	Metazoa	Chordata	Mammalia	Carnivora	Otariidae	Eumetopias	scaffold	vertebrate
GCF_000325575.1	Pteropus alecto	Eukaryota	Metazoa	Chordata	Mammalia	Chiroptera	Pteropodidae	Pteropus	scaffold	vertebrate
GCF_002204375.1	Meriones unguiculatus	Eukaryota	Metazoa	Chordata	Mammalia	Rodentia	Muridae	Meriones	scaffold	vertebrate
GCF_002940915.1	Desmodus rotundus	Eukaryota	Metazoa	Chordata	Mammalia	Chiroptera	Phyllostomidae	Desmodus	scaffold	vertebrate
GCF_000260255.1	Octodon degus	Eukaryota	Metazoa	Chordata	Mammalia	Rodentia	Octodontidae	Octodon	scaffold	vertebrate
GCF_000296735.1	Chrysochloris asiatica	Eukaryota	Metazoa	Chordata	Mammalia	Afrotheria (SUPERORDER)	Chrysochloridae	Chrysocloris	scaffold	vertebrate
GCF_001857705.1	Panthera pardus	Eukaryota	Metazoa	Chordata	Mammalia	Carnivora	Felidae	Panthera	scaffold	vertebrate
GCF_000276665.1	Chinchilla lanigera	Eukaryota	Metazoa	Chordata	Mammalia	Rodentia	Chinchillidae	Chinchilla	scaffold	vertebrate
GCF_002288905.1	Enhydra lutris kenyoni	Eukaryota	Metazoa	Chordata	Mammalia	Carnivora	Mustelidae	Enhydra	scaffold	vertebrate
GCF_012274545.1	Fukomys damarensis	Eukaryota	Metazoa	Chordata	Mammalia	Rodentia	Bathyergidae	Fukomys	scaffold	vertebrate
GCF_000696425.1	Galeopterus variegatus	Eukaryota	Metazoa	Chordata	Mammalia	Dermoptera	Cynocephalidae	Galeopterus	scaffold	vertebrate
GCF_003709585.1	Acinonyx jubatus	Eukaryota	Metazoa	Chordata	Mammalia	Carnivora	Felidae	Acinonyx	scaffold	vertebrate
GCF_000164805.1	Carlito syrichta	Eukaryota	Metazoa	Chordata	Mammalia	Primates	Tarsiidae	Carlito	scaffold	vertebrate
GCF_000247695.1	Heterocephalus glaber	Eukaryota	Metazoa	Chordata	Mammalia	Rodentia	Bathyergidae	Heterocephalus	scaffold	vertebrate
GCF_000308155.1	Eptesicus fuscus	Eukaryota	Metazoa	Chordata	Mammalia	Chiroptera	Vespertilionidae	Eptesicus	scaffold	vertebrate
GCF_000334495.1	Tupaia chinensis	Eukaryota	Metazoa	Chordata	Mammalia	Scandentia	Tupaiidae	Tupaia	scaffold	vertebrate
GCF_000181275.1	Sorex araneus	Eukaryota	Metazoa	Chordata	Mammalia	Eulipotyphla	Soricidae	Sorex	scaffold	vertebrate
GCF_000283155.1	Ceratotherium simum simum	Eukaryota	Metazoa	Chordata	Mammalia	Perissodactyla	Rhinocerotidae	Ceratotherium	scaffold	vertebrate
GCF_000147115.1	Myotis lucifugus	Eukaryota	Metazoa	Chordata	Mammalia	Chiroptera	Vespertilionidae	Myotis	scaffold	vertebrate
GCF_000001905.1	Loxodonta africana	Eukaryota	Metazoa	Chordata	Mammalia	Proboscidea	Elephantidae	Loxodonta	scaffold	vertebrate
GCF_000464555.1	Panthera tigris altaica	Eukaryota	Metazoa	Chordata	Mammalia	Carnivora	Felidae	Panthera	scaffold	vertebrate
GCF_009761245.1	Sapajus apella	Eukaryota	Metazoa	Chordata	Mammalia	Primates	Cebidae	Sapajus	scaffold	vertebrate
GCF_001890085.1	Hipposideros armiger	Eukaryota	Metazoa	Chordata	Mammalia	Chiroptera	Hipposideridae	Hipposideros	scaffold	vertebrate
GCF_001698545.1	Rhinopithecus bieti	Eukaryota	Metazoa	Chordata	Mammalia	Primates	Cercopithecidae	Rhinopithecus	scaffold	vertebrate
GCF_000243295.1	Trichechus manatus latirostris	Eukaryota	Metazoa	Chordata	Mammalia	Sirenia	Trichechidae	Trichechus	scaffold	vertebrate
GCF_001305755.1	Equus asinus	Eukaryota	Metazoa	Chordata	Mammalia	Perissodactyla	Equidae	Equus	scaffold	vertebrate
GCF_003160815.1	Vulpes vulpes	Eukaryota	Metazoa	Chordata	Mammalia	Carnivora	Canidae	Vulpes	scaffold	vertebrate
GCF_000292845.1	Ochotona princeps	Eukaryota	Metazoa	Chordata	Mammalia	Lagomorpha	Ochotonidae	Ochotona	scaffold	vertebrate
GCF_003031525.1	Neophocaena asiaeorientalis asiaeorientalis	Eukaryota	Metazoa	Chordata	Mammalia	Artiodactyla	Phocoenidae	Neophocaena	scaffold	vertebrate
GCF_001604975.1	Cebus capucinus imitator	Eukaryota	Metazoa	Chordata	Mammalia	Primates	Cebidae	Cebus	scaffold	vertebrate
GCF_000696695.1	Equus przewalskii	Eukaryota	Metazoa	Chordata	Mammalia	Perissodactyla	Equidae	Equus	scaffold	vertebrate
GCF_000235385.1	Saimiri boliviensis boliviensis	Eukaryota	Metazoa	Chordata	Mammalia	Primates	Cebidae	Saimiri	scaffold	vertebrate
GCF_001984765.1	Castor canadensis	Eukaryota	Metazoa	Chordata	Mammalia	Rodentia	Castoridae	Castor	scaffold	vertebrate
GCF_000442215.1	Lipotes vexillifer	Eukaryota	Metazoa	Chordata	Mammalia	Artiodactyla	Lipotidae	Lipotes	scaffold	vertebrate
GCF_000151845.1	Pteropus vampyrus	Eukaryota	Metazoa	Chordata	Mammalia	Chiroptera	Pteropodidae	Pteropus	scaffold	vertebrate
GCF_000767855.1	Camelus bactrianus	Eukaryota	Metazoa	Chordata	Mammalia	Artiodactyla	Camelidae	Camelus	scaffold	vertebrate
GCF_000236235.1	Ictidomys tridecemlineatus	Eukaryota	Metazoa	Chordata	Mammalia	Rodentia	Sciuridae	Ictidomys	scaffold	vertebrate
GCF_003426925.1	Urocitellus parryii	Eukaryota	Metazoa	Chordata	Mammalia	Rodentia	Sciuridae	Urocitellus	scaffold	vertebrate
GCF_000955945.1	Cercocebus atys	Eukaryota	Metazoa	Chordata	Mammalia	Primates	Cercopithecidae	Cercocebus	scaffold	vertebrate
GCF_900631625.1	Zalophus californianus	Eukaryota	Metazoa	Chordata	Mammalia	Carnivora	Otariidae	Zalophus	scaffold	vertebrate
GCF_000181295.1	Otolemur garnettii	Eukaryota	Metazoa	Chordata	Mammalia	Primates	Galagidae	Otolemur	scaffold	vertebrate
GCF_900497805.2	Vombatus ursinus	Eukaryota	Metazoa	Chordata	Mammalia	Diprotodontia	Vombatidae	Vombatus	scaffold	vertebrate
GCF_003676395.1	Lagenorhynchus obliquidens	Eukaryota	Metazoa	Chordata	Mammalia	Artiodactyla	Delphinidae	Lagenorhynchus	scaffold	vertebrate
GCF_000622305.1	Nannospalax galili	Eukaryota	Metazoa	Chordata	Mammalia	Rodentia	Spalacidae	Nannospalax	scaffold	vertebrate
GCF_000951045.1	Mandrillus leucophaeus	Eukaryota	Metazoa	Chordata	Mammalia	Primates	Cercopithecidae	Mandrillus	scaffold	vertebrate
GCF_000500345.1	Peromyscus maniculatus bairdii	Eukaryota	Metazoa	Chordata	Mammalia	Rodentia	Cricetidae	Peromyscus	scaffold	vertebrate
GCF_000313985.2	Echinops telfairi	Eukaryota	Metazoa	Chordata	Mammalia	Afrotheria (SUPERORDER)	Tenrecidae	Echinops	scaffold	vertebrate
GCF_000956065.1	Macaca nemestrina	Eukaryota	Metazoa	Chordata	Mammalia	Primates	Cercopithecidae	Macaca	scaffold	vertebrate
GCF_004785775.1	Grammomys surdaster	Eukaryota	Metazoa	Chordata	Mammalia	Rodentia	Muridae	Grammomys	scaffold	vertebrate
GCF_000223135.1	Cricetulus griseus	Eukaryota	Metazoa	Chordata	Mammalia	Rodentia	Cricetidae	Cricetulus	scaffold	vertebrate
GCF_001458135.1	Marmota marmota marmota	Eukaryota	Metazoa	Chordata	Mammalia	Rodentia	Sciuridae	Marmota	scaffold	vertebrate
GCF_003676075.2	Marmota flaviventris	Eukaryota	Metazoa	Chordata	Mammalia	Rodentia	Sciuridae	Marmota	scaffold	vertebrate
GCF_002288925.2	Delphinapterus leucas	Eukaryota	Metazoa	Chordata	Mammalia	Artiodactyla	Monodontidae	Delphinapterus	scaffold	vertebrate
GCF_002102435.1	Odocoileus virginianus texanus	Eukaryota	Metazoa	Chordata	Mammalia	Artiodactyla	Cervidae	Odocoileus	scaffold	vertebrate
GCF_000951035.1	Colobus angolensis palliatus	Eukaryota	Metazoa	Chordata	Mammalia	Primates	Cercopithecidae	Colobus	scaffold	vertebrate
GCF_005190385.1	Monodon monoceros	Eukaryota	Metazoa	Chordata	Mammalia	Artiodactyla	Monodontidae	Monodon	scaffold	vertebrate
GCF_000260355.1	Condylura cristata	Eukaryota	Metazoa	Chordata	Mammalia	Eulipotyphla	Talpidae	Condylura	scaffold	vertebrate
GCF_002099425.1	Phascolarctos cinereus	Eukaryota	Metazoa	Chordata	Mammalia	Diprotodontia	Phascolarctidae	Phascolarctos	contig	vertebrate
GCF_013103735.1	Etheostoma cragini	Eukaryota	Metazoa	Chordata	Actinopteri	Perciformes	Percidae	Etheostoma	chromosome	vertebrate
GCF_001858045.2	Oreochromis niloticus	Eukaryota	Metazoa	Chordata	Actinopteri	Cichliformes	Cichlidae	Oreochromis	chromosome	vertebrate
GCF_002234675.1	Oryzias latipes	Eukaryota	Metazoa	Chordata	Actinopteri	Beloniformes	Adrianichthyidae	Oryzias	chromosome	vertebrate
GCF_013347855.1	Anguilla anguilla	Eukaryota	Metazoa	Chordata	Actinopteri	Anguilliformes	Anguillidae	Anguilla	chromosome	vertebrate
GCF_009819885.1	Catharus ustulatus	Eukaryota	Metazoa	Chordata	Aves	Passeriformes	Turdidae	Catharus	chromosome	vertebrate
GCF_000238955.4	Maylandia zebra	Eukaryota	Metazoa	Chordata	Actinopteri	Cichliformes	Cichlidae	Maylandia	chromosome	vertebrate
GCF_900246225.1	Astatotilapia calliptera	Eukaryota	Metazoa	Chordata	Actinopteri	Cichliformes	Cichlidae	Astatotilapia	chromosome	vertebrate
GCF_000372685.2	Astyanax mexicanus	Eukaryota	Metazoa	Chordata	Actinopteri	Characiformes	Characidae	Astyanax	chromosome	vertebrate
GCF_009769535.1	Thamnophis elegans	Eukaryota	Metazoa	Chordata	Lepidosauria	Squamata	Colubridae	Thamnophis	chromosome	vertebrate
GCF_900880675.1	Sparus aurata	Eukaryota	Metazoa	Chordata	Actinopteri	Spariformes	Sparidae	Sparus	chromosome	vertebrate
GCF_009829145.1	Chiroxiphia lanceolata	Eukaryota	Metazoa	Chordata	Aves	Passeriformes	Pipridae	Chiroxiphia	chromosome	vertebrate
GCF_000242695.1	Lepisosteus oculatus	Eukaryota	Metazoa	Chordata	Actinopteri	Semionotiformes	Lepisosteidae	Lepisosteus	chromosome	vertebrate
GCF_008692095.1	Etheostoma spectabile	Eukaryota	Metazoa	Chordata	Actinopteri	Perciformes	Percidae	Etheostoma	chromosome	vertebrate
GCF_004354835.1	Perca flavescens	Eukaryota	Metazoa	Chordata	Actinopteri	Perciformes	Percidae	Perca	chromosome	vertebrate
GCF_000002035.6	Danio rerio	Eukaryota	Metazoa	Chordata	Actinopteri	Cypriniformes	Danionidae	Danio	chromosome	vertebrate
GCF_002910315.2	Salvelinus alpinus	Eukaryota	Metazoa	Chordata	Actinopteri	Salmoniformes	Salmonidae	Salvelinus	chromosome	vertebrate
GCF_001465895.1	Nothobranchius furzeri	Eukaryota	Metazoa	Chordata	Actinopteri	Cyprinodontiformes	Nothobranchiidae	Nothobranchius	chromosome	vertebrate
GCF_000241765.3	Chrysemys picta bellii	Eukaryota	Metazoa	Chordata	Sarcopterygii (SUPERCLASS)	Testudines	Emydidae	Chrysemys	chromosome	vertebrate
GCF_000523025.1	Cynoglossus semilaevis	Eukaryota	Metazoa	Chordata	Actinopteri	Pleuronectiformes	Cynoglossidae	Cynoglossus	chromosome	vertebrate
GCF_007364275.1	Archocentrus centrarchus	Eukaryota	Metazoa	Chordata	Actinopteri	Cichliformes	Cichlidae	Archocentrus	chromosome	vertebrate
GCF_900964775.1	Scleropages formosus	Eukaryota	Metazoa	Chordata	Actinopteri	Osteoglossiformes	Osteoglossidae	Scleropages	chromosome	vertebrate
GCF_009819535.1	Lacerta agilis	Eukaryota	Metazoa	Chordata	Lepidosauria	Squamata	Lacertidae	Lacerta	chromosome	vertebrate
GCF_003850225.1	Anas platyrhynchos	Eukaryota	Metazoa	Chordata	Aves	Anseriformes	Anatidae	Anas	chromosome	vertebrate
GCF_902150065.1	Myripristis murdjan	Eukaryota	Metazoa	Chordata	Actinopteri	Holocentriformes	Holocentridae	Myripristis	chromosome	vertebrate
GCF_002775205.1	Xiphophorus maculatus	Eukaryota	Metazoa	Chordata	Actinopteri	Cyprinodontiformes	Poeciliidae	Xiphophorus	chromosome	vertebrate
GCF_902167405.1	Gadus morhua	Eukaryota	Metazoa	Chordata	Actinopteri	Gadiformes	Gadidae	Gadus	chromosome	vertebrate
GCF_000951615.1	Cyprinus carpio	Eukaryota	Metazoa	Chordata	Actinopteri	Cypriniformes	Cyprinidae	Cyprinus	chromosome	vertebrate
GCF_007399415.2	Gopherus evgoodei	Eukaryota	Metazoa	Chordata	Sarcopterygii (SUPERCLASS)	Testudines	Testudinidae	Gopherus	chromosome	vertebrate
GCF_900324465.2	Anabas testudineus	Eukaryota	Metazoa	Chordata	Actinopteri	Anabantiformes	Anabantidae	Anabas	chromosome	vertebrate
GCF_902362185.1	Chanos chanos	Eukaryota	Metazoa	Chordata	Actinopteri	Gonorynchiformes	Chanidae	Chanos	chromosome	vertebrate
GCF_011077185.1	Oxyura jamaicensis	Eukaryota	Metazoa	Chordata	Aves	Anseriformes	Anatidae	Oxyura	chromosome	vertebrate
GCF_011800845.1	Zootoca vivipara	Eukaryota	Metazoa	Chordata	Lepidosauria	Squamata	Lacertidae	Zootoca	chromosome	vertebrate
GCF_001660625.1	Ictalurus punctatus	Eukaryota	Metazoa	Chordata	Actinopteri	Siluriformes	Ictaluridae	Ictalurus	chromosome	vertebrate
GCF_005281545.1	Epinephelus lanceolatus	Eukaryota	Metazoa	Chordata	Actinopteri	Perciformes	Serranidae	Epinephelus	chromosome	vertebrate
GCF_002163495.1	Oncorhynchus mykiss	Eukaryota	Metazoa	Chordata	Actinopteri	Salmoniformes	Salmonidae	Oncorhynchus	chromosome	vertebrate
GCF_901001165.1	Salmo trutta	Eukaryota	Metazoa	Chordata	Actinopteri	Salmoniformes	Salmonidae	Salmo	chromosome	vertebrate
GCF_900963305.1	Echeneis naucrates	Eukaryota	Metazoa	Chordata	Actinopteri	Carangiformes	Echeneidae	Echeneis	chromosome	vertebrate
GCF_004027225.2	Strigops habroptila	Eukaryota	Metazoa	Chordata	Aves	Psittaciformes	Psittacidae	Strigops	chromosome	vertebrate
GCF_902148855.1	Sphaeramia orbicularis	Eukaryota	Metazoa	Chordata	Actinopteri	Kurtiformes	Apogonidae	Sphaeramia	chromosome	vertebrate
GCF_006149115.1	Oncorhynchus nerka	Eukaryota	Metazoa	Chordata	Actinopteri	Salmoniformes	Salmonidae	Oncorhynchus	chromosome	vertebrate
GCF_002872995.1	Oncorhynchus tshawytscha	Eukaryota	Metazoa	Chordata	Actinopteri	Salmoniformes	Salmonidae	Oncorhynchus	chromosome	vertebrate
GCF_012275295.1	Melopsittacus undulatus	Eukaryota	Metazoa	Chordata	Aves	Psittaciformes	Psittaculidae	Melopsittacus	chromosome	vertebrate
GCF_900496995.1	Aquila chrysaetos chrysaetos	Eukaryota	Metazoa	Chordata	Aves	Accipitriformes	Accipitridae	Aquila	chromosome	vertebrate
GCF_010993605.1	Petromyzon marinus	Eukaryota	Metazoa	Chordata	Hyperoartia	Petromyzontiformes	Petromyzontidae	Petromyzon	chromosome	vertebrate
GCF_902148845.1	Salarias fasciatus	Eukaryota	Metazoa	Chordata	Actinopteri	Blenniiformes	Blenniidae	Salarias	chromosome	vertebrate
GCF_900634415.1	Cottoperca gobio	Eukaryota	Metazoa	Chordata	Actinopteri	Perciformes	Bovichtidae	Cottoperca	chromosome	vertebrate
GCF_003368295.1	Carassius auratus	Eukaryota	Metazoa	Chordata	Actinopteri	Cypriniformes	Cyprinidae	Carassius	chromosome	vertebrate
GCF_901000725.2	Takifugu rubripes	Eukaryota	Metazoa	Chordata	Actinopteri	Tetraodontiformes	Tetraodontidae	Takifugu	chromosome	vertebrate
GCF_001663975.1	Xenopus laevis	Eukaryota	Metazoa	Chordata	Amphibia	Anura	Pipidae	Xenopus	chromosome	vertebrate
GCF_010909765.1	Amblyraja radiata	Eukaryota	Metazoa	Chordata	Chondrichthyes	Rajiformes	Rajidae	Amblyraja	chromosome	vertebrate
GCF_000247815.1	Ficedula albicollis	Eukaryota	Metazoa	Chordata	Aves	Passeriformes	Muscicapidae	Ficedula	chromosome	vertebrate
GCF_900700375.1	Denticeps clupeoides	Eukaryota	Metazoa	Chordata	Actinopteri	Clupeiformes	Denticipitidae	Denticeps	chromosome	vertebrate
GCF_009819705.1	Hippoglossus hippoglossus	Eukaryota	Metazoa	Chordata	Actinopteri	Pleuronectiformes	Pleuronectidae	Hippoglossus	chromosome	vertebrate
GCF_901001135.1	Rhinatrema bivittatum	Eukaryota	Metazoa	Chordata	Amphibia	Gymnophiona	Rhinatrematidae	Rhinatrema	chromosome	vertebrate
GCF_902500255.1	Thalassophryne amazonica	Eukaryota	Metazoa	Chordata	Actinopteri	Batrachoidiformes	Batrachoididae	Thalassophryne	chromosome	vertebrate
GCF_901933205.1	Camarhynchus parvulus	Eukaryota	Metazoa	Chordata	Aves	Passeriformes	Thraupidae	Camarhynchus	chromosome	vertebrate
GCF_009762535.1	Notolabrus celidotus	Eukaryota	Metazoa	Chordata	Actinopteri	Labriformes	Labridae	Notolabrus	chromosome	vertebrate
GCF_001577835.2	Coturnix japonica	Eukaryota	Metazoa	Chordata	Aves	Galliformes	Phasianidae	Coturnix	chromosome	vertebrate
GCF_009829125.1	Periophthalmus magnuspinnatus	Eukaryota	Metazoa	Chordata	Actinopteri	Gobiiformes	Gobiidae	Periophthalmus	chromosome	vertebrate
GCF_011004845.1	Esox lucius	Eukaryota	Metazoa	Chordata	Actinopteri	Esociformes	Esocidae	Esox	chromosome	vertebrate
GCF_001522545.3	Parus major	Eukaryota	Metazoa	Chordata	Aves	Passeriformes	Paridae	Parus	chromosome	vertebrate
GCF_013100865.1	Trachemys scripta elegans	Eukaryota	Metazoa	Chordata	Sarcopterygii (SUPERCLASS)	Testudines	Emydidae	Trachemys	chromosome	vertebrate
GCF_008822105.2	Taeniopygia guttata	Eukaryota	Metazoa	Chordata	Aves	Passeriformes	Estrildidae	Taeniopygia	chromosome	vertebrate
GCF_013339905.1	Hippoglossus stenolepis	Eukaryota	Metazoa	Chordata	Actinopteri	Pleuronectiformes	Pleuronectidae	Hippoglossus	chromosome	vertebrate
GCF_000002315.6	Gallus gallus	Eukaryota	Metazoa	Chordata	Aves	Galliformes	Phasianidae	Gallus	chromosome	vertebrate
GCF_000146605.3	Meleagris gallopavo	Eukaryota	Metazoa	Chordata	Aves	Galliformes	Phasianidae	Meleagris	chromosome	vertebrate
GCF_009078355.1	Pangasianodon hypophthalmus	Eukaryota	Metazoa	Chordata	Actinopteri	Siluriformes	Pangasiidae	Pangasianodon	chromosome	vertebrate
GCF_000233375.1	Salmo salar	Eukaryota	Metazoa	Chordata	Actinopteri	Salmoniformes	Salmonidae	Salmo	chromosome	vertebrate
GCF_000090745.1	Anolis carolinensis	Eukaryota	Metazoa	Chordata	Lepidosauria	Squamata	Dactyloidae	Anolis	chromosome	vertebrate
GCF_001444195.1	Xiphophorus couchianus	Eukaryota	Metazoa	Chordata	Actinopteri	Cyprinodontiformes	Poeciliidae	Xiphophorus	chromosome	vertebrate
GCF_002078875.1	Numida meleagris	Eukaryota	Metazoa	Chordata	Aves	Galliformes	Numididae	Numida	chromosome	vertebrate
GCF_900634795.2	Betta splendens	Eukaryota	Metazoa	Chordata	Actinopteri	Anabantiformes	Osphronemidae	Betta	chromosome	vertebrate
GCF_004329235.1	Podarcis muralis	Eukaryota	Metazoa	Chordata	Lepidosauria	Squamata	Lacertidae	Podarcis	chromosome	vertebrate
GCF_009650955.1	Corvus moneduloides	Eukaryota	Metazoa	Chordata	Aves	Passeriformes	Corvidae	Corvus	chromosome	vertebrate
GCF_000972845.2	Larimichthys crocea	Eukaryota	Metazoa	Chordata	Actinopteri	Perciformes	Sciaenidae	Larimichthys	chromosome	vertebrate
GCF_009819795.1	Aythya fuligula	Eukaryota	Metazoa	Chordata	Aves	Anseriformes	Anatidae	Aythya	chromosome	vertebrate
GCF_010645085.1	Acipenser ruthenus	Eukaryota	Metazoa	Chordata	Actinopteri	Acipenseriformes	Acipenseridae	Acipenser	chromosome	vertebrate
GCF_902827115.1	Pseudochaenichthys georgianus	Eukaryota	Metazoa	Chordata	Actinopteri	Perciformes	Channichthyidae	Pseudochaenichthys	chromosome	vertebrate
GCF_900634775.1	Gouania willdenowi	Eukaryota	Metazoa	Chordata	Actinopteri	Blenniiformes	Gobiesocidae	Gouania	chromosome	vertebrate
GCF_003957555.1	Calypte anna	Eukaryota	Metazoa	Chordata	Aves	Apodiformes	Trochilidae	Calypte	chromosome	vertebrate
GCF_009769545.1	Cyclopterus lumpus	Eukaryota	Metazoa	Chordata	Actinopteri	Perciformes	Cyclopteridae	Cyclopterus	chromosome	vertebrate
GCF_900747795.1	Erpetoichthys calabaricus	Eukaryota	Metazoa	Chordata	Cladistia	Polypteriformes	Polypteridae	Erpetoichthys	chromosome	vertebrate
GCF_003331165.1	Xiphophorus hellerii	Eukaryota	Metazoa	Chordata	Actinopteri	Cyprinodontiformes	Poeciliidae	Xiphophorus	chromosome	vertebrate
GCF_901765095.1	Microcaecilia unicolor	Eukaryota	Metazoa	Chordata	Amphibia	Gymnophiona	Siphonopidae	Microcaecilia	chromosome	vertebrate
GCF_000004195.4	Xenopus tropicalis	Eukaryota	Metazoa	Chordata	Amphibia	Anura	Pipidae	Xenopus	chromosome	vertebrate
GCF_900634625.1	Parambassis ranga	Eukaryota	Metazoa	Chordata	Actinopteri	Perciformes	Ambassidae	Parambassis	chromosome	vertebrate
GCF_005870125.1	Lonchura striata domestica	Eukaryota	Metazoa	Chordata	Aves	Passeriformes	Estrildidae	Lonchura	chromosome	vertebrate
GCF_002021735.2	Oncorhynchus kisutch	Eukaryota	Metazoa	Chordata	Actinopteri	Salmoniformes	Salmonidae	Oncorhynchus	chromosome	vertebrate
GCF_900324485.2	Mastacembelus armatus	Eukaryota	Metazoa	Chordata	Actinopteri	Synbranchiformes	Mastacembelidae	Mastacembelus	chromosome	vertebrate
GCF_902459505.1	Geotrypetes seraphini	Eukaryota	Metazoa	Chordata	Amphibia	Gymnophiona	Dermophiidae	Geotrypetes	chromosome	vertebrate
GCF_900700415.1	Clupea harengus	Eukaryota	Metazoa	Chordata	Actinopteri	Clupeiformes	Clupeidae	Clupea	chromosome	vertebrate
GCF_000633615.1	Poecilia reticulata	Eukaryota	Metazoa	Chordata	Actinopteri	Cyprinodontiformes	Poeciliidae	Poecilia	chromosome	vertebrate
GCF_000230535.1	Pelodiscus sinensis	Eukaryota	Metazoa	Chordata	Sarcopterygii (SUPERCLASS)	Testudines	Trionychidae	Pelodiscus	scaffold	vertebrate
GCF_001891065.1	Hippocampus comes	Eukaryota	Metazoa	Chordata	Actinopteri	Syngnathiformes	Syngnathidae	Hippocampus	scaffold	vertebrate
GCF_000687285.1	Phaethon lepturus	Eukaryota	Metazoa	Chordata	Aves	Pelecaniformes	Phaethontidae	Phaethon	scaffold	vertebrate
GCF_003945725.1	Corapipo altera	Eukaryota	Metazoa	Chordata	Aves	Passeriformes	Pipridae	Corapipo	scaffold	vertebrate
GCF_002901205.1	Cyanistes caeruleus	Eukaryota	Metazoa	Chordata	Aves	Passeriformes	Paridae	Cyanistes	scaffold	vertebrate
GCF_001515625.1	Sinocyclocheilus rhinocerous	Eukaryota	Metazoa	Chordata	Actinopteri	Cypriniformes	Cyprinidae	Sinocyclocheilus	scaffold	vertebrate
GCF_000687185.1	Egretta garzetta	Eukaryota	Metazoa	Chordata	Aves	Pelecaniformes	Ardeidae	Egretta	scaffold	vertebrate
GCF_000331425.1	Pseudopodoces humilis	Eukaryota	Metazoa	Chordata	Aves	Passeriformes	Paridae	Pseudopodoces	scaffold	vertebrate
GCF_000277835.1	Geospiza fortis	Eukaryota	Metazoa	Chordata	Aves	Passeriformes	Thraupidae	Geospiza	scaffold	vertebrate
GCF_001715985.3	Manacus vitellinus	Eukaryota	Metazoa	Chordata	Aves	Passeriformes	Pipridae	Manacus	scaffold	vertebrate
GCF_000690725.1	Stegastes partitus	Eukaryota	Metazoa	Chordata	Actinopteri	Perciformes	Pomacentridae	Stegastes	scaffold	vertebrate
GCF_003342845.1	Nothoprocta perdicaria	Eukaryota	Metazoa	Chordata	Aves	Tinamiformes	Tinamidae	Nothoprocta	scaffold	vertebrate
GCF_001640805.1	Lates calcarifer	Eukaryota	Metazoa	Chordata	Actinopteri	Perciformes	Centropomidae	Lates	scaffold	vertebrate
GCF_001443285.1	Poecilia latipinna	Eukaryota	Metazoa	Chordata	Actinopteri	Cyprinodontiformes	Poeciliidae	Poecilia	scaffold	vertebrate
GCF_000690775.1	Eurypyga helias	Eukaryota	Metazoa	Chordata	Aves	Gruiformes	Eurypygidae	Eurypyga	scaffold	vertebrate
GCF_000700745.1	Antrostomus carolinensis	Eukaryota	Metazoa	Chordata	Aves	Caprimulgiformes	Caprimulgidae	Antrostomus	scaffold	vertebrate
GCF_001443325.1	Poecilia mexicana	Eukaryota	Metazoa	Chordata	Actinopteri	Cyprinodontiformes	Poeciliidae	Poecilia	scaffold	vertebrate
GCF_003259725.1	Athene cunicularia	Eukaryota	Metazoa	Chordata	Aves	Strigiformes	Strigidae	Athene	scaffold	vertebrate
GCF_000747805.1	Chaetura pelagica	Eukaryota	Metazoa	Chordata	Aves	Apodiformes	Apodidae	Chaetura	scaffold	vertebrate
GCF_002776465.1	Amphiprion ocellaris	Eukaryota	Metazoa	Chordata	Actinopteri	Perciformes	Pomacentridae	Amphiprion	scaffold	vertebrate
GCF_000225785.1	Latimeria chalumnae	Eukaryota	Metazoa	Chordata	Coelacanthimorpha	Coelacanthiformes	Coelacanthidae	Latimeria	scaffold	vertebrate
GCF_000690835.1	Fulmarus glacialis	Eukaryota	Metazoa	Chordata	Aves	Procellariiformes	Procellariidae	Fulmarus	scaffold	vertebrate
GCF_000709895.1	Balearica regulorum gibbericeps	Eukaryota	Metazoa	Chordata	Aves	Gruiformes	Gruidae	Balearica	scaffold	vertebrate
GCF_000709325.1	Cuculus canorus	Eukaryota	Metazoa	Chordata	Aves	Cuculiformes	Cuculidae	Cuculus	scaffold	vertebrate
GCF_000699005.1	Picoides pubescens	Eukaryota	Metazoa	Chordata	Aves	Piciformes	Picidae	Picoides	scaffold	vertebrate
GCF_000691975.1	Corvus brachyrhynchos	Eukaryota	Metazoa	Chordata	Aves	Passeriformes	Corvidae	Corvus	scaffold	vertebrate
GCF_000708225.1	Nipponia nippon	Eukaryota	Metazoa	Chordata	Aves	Pelecaniformes	Threskiornithidae	Nipponia	scaffold	vertebrate
GCF_001604755.1	Lepidothrix coronata	Eukaryota	Metazoa	Chordata	Aves	Passeriformes	Pipridae	Lepidothrix	scaffold	vertebrate
GCF_902827165.1	Trematomus bernacchii	Eukaryota	Metazoa	Chordata	Actinopteri	Perciformes	Nototheniidae	Trematomus	scaffold	vertebrate
GCF_003724035.1	Tachysurus fulvidraco	Eukaryota	Metazoa	Chordata	Actinopteri	Siluriformes	Bagridae	Tachysurus	scaffold	vertebrate
GCF_000690535.1	Cariama cristata	Eukaryota	Metazoa	Chordata	Aves	Cariamiformes	Cariamidae	Cariama	scaffold	vertebrate
GCF_000692075.1	Opisthocomus hoazin	Eukaryota	Metazoa	Chordata	Aves	Opisthocomiformes	Opisthocomidae	Opisthocomus	scaffold	vertebrate
GCF_000165045.1	Callorhinchus milii	Eukaryota	Metazoa	Chordata	Chondrichthyes	Chimaeriformes	Callorhinchidae	Callorhinchus	scaffold	vertebrate
GCF_902150015.1	Tyto alba alba	Eukaryota	Metazoa	Chordata	Aves	Strigiformes	Tytonidae	Tyto	scaffold	vertebrate
GCF_000691785.1	Leptosomus discolor	Eukaryota	Metazoa	Chordata	Aves	Coraciiformes	Leptosomidae	Leptosomus	scaffold	vertebrate
GCF_002872115.1	Paramormyrops kingsleyae	Eukaryota	Metazoa	Chordata	Actinopteri	Osteoglossiformes	Mormyridae	Paramormyrops	scaffold	vertebrate
GCF_000691405.1	Haliaeetus albicilla	Eukaryota	Metazoa	Chordata	Aves	Accipitriformes	Accipitridae	Haliaeetus	scaffold	vertebrate
GCF_000691845.1	Merops nubicus	Eukaryota	Metazoa	Chordata	Aves	Coraciiformes	Meropidae	Merops	scaffold	vertebrate
GCF_001515645.1	Sinocyclocheilus grahami	Eukaryota	Metazoa	Chordata	Actinopteri	Cypriniformes	Cyprinidae	Sinocyclocheilus	scaffold	vertebrate
GCF_000695815.1	Acanthisitta chloris	Eukaryota	Metazoa	Chordata	Aves	Passeriformes	Acanthisittidae	Acanthisitta	scaffold	vertebrate
GCF_001077635.1	Thamnophis sirtalis	Eukaryota	Metazoa	Chordata	Lepidosauria	Squamata	Colubridae	Thamnophis	scaffold	vertebrate
GCF_001266775.1	Austrofundulus limnaeus	Eukaryota	Metazoa	Chordata	Actinopteri	Cyprinodontiformes	Rivulidae	Austrofundulus	scaffold	vertebrate
GCF_001642345.1	Rhincodon typus	Eukaryota	Metazoa	Chordata	Chondrichthyes	Orectolobiformes	Rhincodontidae	Rhincodon	scaffold	vertebrate
GCF_003031625.1	Empidonax traillii	Eukaryota	Metazoa	Chordata	Aves	Passeriformes	Tyrannidae	Empidonax	scaffold	vertebrate
GCF_000455745.1	Alligator sinensis	Eukaryota	Metazoa	Chordata	Sarcopterygii (SUPERCLASS)	Crocodylia	Alligatoridae	Alligator	scaffold	vertebrate
GCF_001952655.1	Monopterus albus	Eukaryota	Metazoa	Chordata	Actinopteri	Synbranchiformes	Synbranchidae	Monopterus	scaffold	vertebrate
GCF_000344595.1	Chelonia mydas	Eukaryota	Metazoa	Chordata	Sarcopterygii (SUPERCLASS)	Testudines	Chelonioidea	Chelonia	scaffold	vertebrate
GCF_900518725.1	Notechis scutatus	Eukaryota	Metazoa	Chordata	Lepidosauria	Squamata	Elapidae	Notechis	scaffold	vertebrate
GCF_001682695.1	Pygocentrus nattereri	Eukaryota	Metazoa	Chordata	Actinopteri	Characiformes	Serrasalmidae	Pygocentrus	scaffold	vertebrate
GCF_000971095.1	Anser cygnoides domesticus	Eukaryota	Metazoa	Chordata	Aves	Anseriformes	Anatidae	Anser	scaffold	vertebrate
GCF_900518735.1	Pseudonaja textilis	Eukaryota	Metazoa	Chordata	Lepidosauria	Squamata	Elapidae	Pseudonaja	scaffold	vertebrate
GCF_000703405.1	Apaloderma vittatum	Eukaryota	Metazoa	Chordata	Aves	Trogoniformes	Trogonidae	Apaloderma	scaffold	vertebrate
GCF_003343035.1	Apteryx rowi	Eukaryota	Metazoa	Chordata	Aves	Apterygiformes	Apterygidae	Apteryx	scaffold	vertebrate
GCF_001649575.1	Kryptolebias marmoratus	Eukaryota	Metazoa	Chordata	Actinopteri	Cyprinodontiformes	Rivulidae	Kryptolebias	scaffold	vertebrate
GCF_000239415.1	Haplochromis burtoni	Eukaryota	Metazoa	Chordata	Actinopteri	Cichliformes	Cichlidae	Haplochromis	scaffold	vertebrate
GCF_000337955.1	Falco peregrinus	Eukaryota	Metazoa	Chordata	Aves	Falconiformes	Falconidae	Falco	scaffold	vertebrate
GCF_000708025.1	Charadrius vociferus	Eukaryota	Metazoa	Chordata	Aves	Charadriiformes	Charadriidae	Charadrius	scaffold	vertebrate
GCF_000337975.1	Falco cherrug	Eukaryota	Metazoa	Chordata	Aves	Falconiformes	Falconidae	Falco	scaffold	vertebrate
GCF_000186305.1	Python bivittatus	Eukaryota	Metazoa	Chordata	Lepidosauria	Squamata	Pythonidae	Python	scaffold	vertebrate
GCF_004143745.1	Phasianus colchicus	Eukaryota	Metazoa	Chordata	Aves	Galliformes	Phasianidae	Phasianus	scaffold	vertebrate
GCF_001431845.1	Calidris pugnax	Eukaryota	Metazoa	Chordata	Aves	Charadriiformes	Scolopacidae	Calidris	scaffold	vertebrate
GCF_000708925.1	Phalacrocorax carbo	Eukaryota	Metazoa	Chordata	Aves	Pelecaniformes	Phalacrocoracidae	Phalacrocorax	scaffold	vertebrate
GCF_001970005.1	Paralichthys olivaceus	Eukaryota	Metazoa	Chordata	Actinopteri	Pleuronectiformes	Paralichthyidae	Paralichthys	scaffold	vertebrate
GCF_900067755.1	Pogona vitticeps	Eukaryota	Metazoa	Chordata	Lepidosauria	Squamata	Agamidae	Pogona	scaffold	vertebrate
GCF_000695195.1	Chlamydotis macqueenii	Eukaryota	Metazoa	Chordata	Aves	Gruiformes	Otididae	Chlamydotis	scaffold	vertebrate
GCF_000337935.1	Columba livia	Eukaryota	Metazoa	Chordata	Aves	Columbiformes	Columbidae	Columba	scaffold	vertebrate
GCF_001185365.1	Pantherophis guttatus	Eukaryota	Metazoa	Chordata	Lepidosauria	Squamata	Colubridae	Pantherophis	scaffold	vertebrate
GCF_000699145.1	Aptenodytes forsteri	Eukaryota	Metazoa	Chordata	Aves	Sphenisciformes	Spheniscidae	Aptenodytes	scaffold	vertebrate
GCF_000239395.1	Neolamprologus brichardi	Eukaryota	Metazoa	Chordata	Actinopteri	Cichliformes	Cichlidae	Neolamprologus	scaffold	vertebrate
GCF_000788275.1	Boleophthalmus pectinirostris	Eukaryota	Metazoa	Chordata	Actinopteri	Gobiiformes	Gobiidae	Boleophthalmus	scaffold	vertebrate
GCF_000239375.1	Pundamilia nyererei	Eukaryota	Metazoa	Chordata	Actinopteri	Cichliformes	Cichlidae	Pundamilia	scaffold	vertebrate
GCF_000738735.2	Corvus cornix cornix	Eukaryota	Metazoa	Chordata	Aves	Passeriformes	Corvidae	Corvus	scaffold	vertebrate
GCF_000699105.1	Pygoscelis adeliae	Eukaryota	Metazoa	Chordata	Aves	Sphenisciformes	Spheniscidae	Pygoscelis	scaffold	vertebrate
GCF_000935625.1	Nanorana parkeri	Eukaryota	Metazoa	Chordata	Amphibia	Anura	Dicroglossidae	Nanorana	scaffold	vertebrate
GCF_900080235.1	Labrus bergylta	Eukaryota	Metazoa	Chordata	Actinopteri	Labriformes	Labridae	Labrus	scaffold	vertebrate
GCF_000732505.1	Cyprinodon variegatus	Eukaryota	Metazoa	Chordata	Actinopteri	Cyprinodontiformes	Cyprinodontidae	Cyprinodon	scaffold	vertebrate
GCF_001723915.1	Gavialis gangeticus	Eukaryota	Metazoa	Chordata	Sarcopterygii (SUPERCLASS)	Crocodylia	Gavialidae	Gavialis	scaffold	vertebrate
GCF_003984885.1	Neopelma chrysocephalum	Eukaryota	Metazoa	Chordata	Aves	Passeriformes	Pipridae	Neopelma	scaffold	vertebrate
GCF_007115625.1	Serinus canaria	Eukaryota	Metazoa	Chordata	Aves	Passeriformes	Fringillidae	Serinus	scaffold	vertebrate
GCF_000737465.1	Haliaeetus leucocephalus	Eukaryota	Metazoa	Chordata	Aves	Accipitriformes	Accipitridae	Haliaeetus	scaffold	vertebrate
GCF_000705375.1	Tinamus guttatus	Eukaryota	Metazoa	Chordata	Aves	Tinamiformes	Tinamidae	Tinamus	scaffold	vertebrate
GCF_000281125.3	Alligator mississippiensis	Eukaryota	Metazoa	Chordata	Sarcopterygii (SUPERCLASS)	Crocodylia	Alligatoridae	Alligator	scaffold	vertebrate
GCF_000385455.1	Zonotrichia albicollis	Eukaryota	Metazoa	Chordata	Aves	Passeriformes	Passerellidae	Zonotrichia	scaffold	vertebrate
GCF_000826765.1	Fundulus heteroclitus	Eukaryota	Metazoa	Chordata	Actinopteri	Cyprinodontiformes	Fundulidae	Fundulus	scaffold	vertebrate
GCF_000687375.1	Pelecanus crispus	Eukaryota	Metazoa	Chordata	Aves	Pelecaniformes	Pelecanidae	Pelecanus	scaffold	vertebrate
GCF_000690715.1	Colius striatus	Eukaryota	Metazoa	Chordata	Aves	Coliiformes	Coliidae	Colius	scaffold	vertebrate
GCF_000709365.1	Tauraco erythrolophus	Eukaryota	Metazoa	Chordata	Aves	Musophagiformes	Musophagidae	Tauraco	scaffold	vertebrate
GCF_001447265.1	Sturnus vulgaris	Eukaryota	Metazoa	Chordata	Aves	Passeriformes	Sturnidae	Sturnus	scaffold	vertebrate
GCF_003597395.1	Chelonoidis abingdonii	Eukaryota	Metazoa	Chordata	Sarcopterygii (SUPERCLASS)	Testudines	Testudinidae	Chelonoidis	scaffold	vertebrate
GCF_002109545.1	Acanthochromis polyacanthus	Eukaryota	Metazoa	Chordata	Actinopteri	Perciformes	Pomacentridae	Acanthochromis	scaffold	vertebrate
GCF_001527695.2	Protobothrops mucrosquamatus	Eukaryota	Metazoa	Chordata	Lepidosauria	Squamata	Viperidae	Protobothrops	scaffold	vertebrate
GCF_002814215.1	Seriola lalandi dorsalis	Eukaryota	Metazoa	Chordata	Actinopteri	Carangiformes	Carangidae	Seriola	scaffold	vertebrate
GCF_000690875.1	Gavia stellata	Eukaryota	Metazoa	Chordata	Aves	Gaviiformes	Gaviidae	Gavia	scaffold	vertebrate
GCF_005870065.1	Oreochromis aureus	Eukaryota	Metazoa	Chordata	Actinopteri	Cichliformes	Cichlidae	Oreochromis	scaffold	vertebrate
GCF_000485575.1	Poecilia formosa	Eukaryota	Metazoa	Chordata	Actinopteri	Cyprinodontiformes	Poeciliidae	Poecilia	scaffold	vertebrate
GCF_000698965.1	Struthio camelus australis	Eukaryota	Metazoa	Chordata	Aves	Struthioniformes	Struthionidae	Struthio	scaffold	vertebrate
GCF_004355925.1	Anarrhichthys ocellatus	Eukaryota	Metazoa	Chordata	Actinopteri	Perciformes	Anarhichadidae	Anarrhichthys	scaffold	vertebrate
GCF_002260705.1	Seriola dumerili	Eukaryota	Metazoa	Chordata	Actinopteri	Carangiformes	Carangidae	Seriola	scaffold	vertebrate
GCF_000735185.1	Notothenia coriiceps	Eukaryota	Metazoa	Chordata	Actinopteri	Perciformes	Nototheniidae	Notothenia	scaffold	vertebrate
GCF_002925995.2	Terrapene carolina triunguis	Eukaryota	Metazoa	Chordata	Sarcopterygii (SUPERCLASS)	Testudines	Em	Terrapene	scaffold	vertebrate
GCF_000695765.1	Mesitornis unicolor	Eukaryota	Metazoa	Chordata	Aves	Gruiformes	Mesitornithidae	Mesitornis	scaffold	vertebrate
GCF_000699245.1	Pterocles gutturalis	Eukaryota	Metazoa	Chordata	Aves	Ciconiiformes	Pteroclidae	Pterocles	scaffold	vertebrate
GCF_001447785.1	Gekko japonicus	Eukaryota	Metazoa	Chordata	Lepidosauria	Squamata	Gekkonidae	Gekko	scaffold	vertebrate
GCF_001723895.1	Crocodylus porosus	Eukaryota	Metazoa	Chordata	Sarcopterygii (SUPERCLASS)	Crocodylia	Crocodylidae	Crocodylus	scaffold	vertebrate
GCF_003342905.1	Dromaius novaehollandiae	Eukaryota	Metazoa	Chordata	Aves	Casuariiformes	Dromaiidae	Dromaius	scaffold	vertebrate
GCF_000696875.1	Nestor notabilis	Eukaryota	Metazoa	Chordata	Aves	Psittaciformes	Psittacidae	Nestor	scaffold	vertebrate
GCF_000710305.1	Buceros rhinoceros silvestris	Eukaryota	Metazoa	Chordata	Aves	Bucerotiformes	Bucerotidae	Buceros	scaffold	vertebrate
GCF_001515605.1	Sinocyclocheilus anshuiensis	Eukaryota	Metazoa	Chordata	Actinopteri	Cypriniformes	Cyprinidae	Sinocyclocheilus	scaffold	vertebrate
GCF_003945595.1	Pipra filicauda	Eukaryota	Metazoa	Chordata	Aves	Passeriformes	Pipridae	Pipra	scaffold	vertebrate
GCF_902827175.1	Gymnodraco acuticeps	Eukaryota	Metazoa	Chordata	Actinopteri	Perciformes	Bathydraconidae	Gymnodraco	scaffold	vertebrate
GCF_008315115.1	Sander lucioperca	Eukaryota	Metazoa	Chordata	Actinopteri	Perciformes	Percidae	Sander	scaffold	vertebrate
GCF_002922805.1	Oryzias melastigma	Eukaryota	Metazoa	Chordata	Actinopteri	Beloniformes	Adrianichthyidae	Oryzias	scaffold	vertebrate
GCF_001039765.1	Apteryx mantelli mantelli	Eukaryota	Metazoa	Chordata	Aves	Apterygiformes	Apterygidae	Apteryx	contig	vertebrate
GCF_000002985.6	Caenorhabditis elegans	Eukaryota	Metazoa	Nematoda	Chromadorea	Rhabditida	Rhabditidae	Caenorhabditis	complete genome	invertebrate
GCF_004354385.1	Drosophila innubila	Eukaryota	Metazoa	Arthropoda	Insecta	Diptera	Drosophilidae	Drosophila	chromosome	invertebrate
GCF_009650485.1	Drosophila albomicans	Eukaryota	Metazoa	Arthropoda	Insecta	Diptera	Drosophilidae	Drosophila	chromosome	invertebrate
GCF_003672135.1	Ooceraea biroi	Eukaryota	Metazoa	Arthropoda	Insecta	Hymenoptera	Formicidae	Ooceraea	chromosome	invertebrate
GCF_902459465.1	Asterias rubens	Eukaryota	Metazoa	Echinodermata	Asteroidea	Forcipulatida	Asteriidae	Asterias	chromosome	invertebrate
GCF_002204515.2	Aedes aegypti	Eukaryota	Metazoa	Arthropoda	Insecta	Diptera	Culicidae	Aedes	chromosome	invertebrate
GCF_006345805.1	Octopus vulgaris	Eukaryota	Metazoa	Mollusca	Cephalopoda	Octopoda	Octopodidae	Octopus	chromosome	invertebrate
GCF_000002335.3	Tribolium castaneum	Eukaryota	Metazoa	Arthropoda	Insecta	Coleoptera	Tenebrionidae	Tribolium	chromosome	invertebrate
GCF_005508785.1	Acyrthosiphon pisum	Eukaryota	Metazoa	Arthropoda	Insecta	Hemiptera	Aphididae	Acyrthosiphon	chromosome	invertebrate
GCF_000237925.1	Schistosoma mansoni	Eukaryota	Metazoa	Platyhelminthes	Trematoda	Strigeidida	Schistosomatidae	Schistosoma	chromosome	invertebrate
GCF_003254395.2	Apis mellifera	Eukaryota	Metazoa	Arthropoda	Insecta	Hymenoptera	Apidae	Apis	chromosome	invertebrate
GCF_009870125.1	Drosophila pseudoobscura	Eukaryota	Metazoa	Arthropoda	Insecta	Diptera	Drosophilidae	Drosophila	chromosome	invertebrate
GCF_002022765.2	Crassostrea virginica	Eukaryota	Metazoa	Mollusca	Bivalvia	Ostreoida	Ostreidae	Crassostrea	chromosome	invertebrate
GCF_000001215.4	Drosophila melanogaster	Eukaryota	Metazoa	Arthropoda	Insecta	Diptera	Drosophilidae	Drosophila	chromosome	invertebrate
GCF_003369915.1	Drosophila miranda	Eukaryota	Metazoa	Arthropoda	Insecta	Diptera	Drosophilidae	Drosophila	chromosome	invertebrate
GCF_000224145.3	Ciona intestinalis	Eukaryota	Metazoa	Chordata	Ascidiacea	Enterogona	Cionidae	Ciona	chromosome	invertebrate
GCF_003590095.1	Trichoplusia ni	Eukaryota	Metazoa	Arthropoda	Insecta	Lepidoptera	Noctuidae	Trichoplusia	chromosome	invertebrate
GCF_002706865.1	Spodoptera litura	Eukaryota	Metazoa	Arthropoda	Insecta	Lepidoptera	Noctuidae	Spodoptera	chromosome	invertebrate
GCF_902652985.1	Pecten maximus	Eukaryota	Metazoa	Mollusca	Bivalvia	Pectinoida	Pectinidae	Pecten	chromosome	invertebrate
GCF_902806685.1	Aphantopus hyperantus	Eukaryota	Metazoa	Arthropoda	Insecta	Lepidoptera	Nymphalidae	Aphantopus	chromosome	invertebrate
GCF_000754195.2	Drosophila simulans	Eukaryota	Metazoa	Arthropoda	Insecta	Diptera	Drosophilidae	Drosophila	chromosome	invertebrate
GCF_000004555.1	Caenorhabditis briggsae	Eukaryota	Metazoa	Nematoda	Chromadorea	Rhabditida	Rhabditidae	Caenorhabditis	chromosome	invertebrate
GCF_004382195.1	Drosophila sechellia	Eukaryota	Metazoa	Arthropoda	Insecta	Diptera	Drosophilidae	Drosophila	chromosome	invertebrate
GCF_011750605.1	Drosophila busckii	Eukaryota	Metazoa	Arthropoda	Insecta	Diptera	Drosophilidae	Drosophila	chromosome	invertebrate
GCF_004382145.1	Drosophila mauritiana	Eukaryota	Metazoa	Arthropoda	Insecta	Diptera	Drosophilidae	Drosophila	chromosome	invertebrate
GCF_009193385.2	Nasonia vitripennis	Eukaryota	Metazoa	Arthropoda	Insecta	Hymenoptera	Pteromalidae	Nasonia	chromosome	invertebrate
GCF_003990815.1	Daphnia magna	Eukaryota	Metazoa	Arthropoda	Branchiopoda	Diplostraca	Daphniidae	Daphnia	chromosome	invertebrate
GCF_000214255.1	Bombus terrestris	Eukaryota	Metazoa	Arthropoda	Insecta	Hymenoptera	Apidae	Bombus	chromosome	invertebrate
GCF_009731565.1	Danaus plexippus plexippus	Eukaryota	Metazoa	Arthropoda	Insecta	Lepidoptera	Nymphalidae	Danaus	chromosome	invertebrate
GCF_003676215.2	Rhopalosiphum maidis	Eukaryota	Metazoa	Arthropoda	Insecta	Hemiptera	Aphididae	Rhopalosiphum	chromosome	invertebrate
GCF_010883055.1	Belonocnema treatae	Eukaryota	Metazoa	Arthropoda	Insecta	Hymenoptera	Cynipidae	Belonocnema	chromosome	invertebrate
GCF_003073045.1	Pomacea canaliculata	Eukaryota	Metazoa	Mollusca	Gastropoda	Architaenioglossa	Ampullariidae	Pomacea	chromosome	invertebrate
GCF_000005575.2	Anopheles gambiae str. PEST	Eukaryota	Metazoa	Arthropoda	Insecta	Diptera	Culicidae	Anopheles	chromosome	invertebrate
GCF_008121235.1	Drosophila subobscura	Eukaryota	Metazoa	Arthropoda	Insecta	Diptera	Drosophilidae	Drosophila	chromosome	invertebrate
GCF_902806645.1	Crassostrea gigas	Eukaryota	Metazoa	Mollusca	Bivalvia	Ostreoida	Ostreidae	Crassostrea	chromosome	invertebrate
GCF_001040885.1	Strongyloides ratti	Eukaryota	Metazoa	Nematoda	Chromadorea	Rhabditida	Strongyloididae	Strongyloides	chromosome	invertebrate
GCF_000005975.2	Drosophila yakuba	Eukaryota	Metazoa	Arthropoda	Insecta	Diptera	Drosophilidae	Drosophila	chromosome	invertebrate
GCF_003227725.1	Camponotus floridanus	Eukaryota	Metazoa	Arthropoda	Insecta	Hymenoptera	Formicidae	Camponotus	scaffold	invertebrate
GCF_001194135.1	Octopus bimaculoides	Eukaryota	Metazoa	Mollusca	Cephalopoda	Octopoda	Octopodidae	Octopus	scaffold	invertebrate
GCF_001901225.1	Dermatophagoides pteronyssinus	Eukaryota	Metazoa	Arthropoda	Arachnida	Sarcoptiformes	Pyroglyphidae	Dermatophagoides	scaffold	invertebrate
GCF_001594045.1	Atta colombica	Eukaryota	Metazoa	Arthropoda	Insecta	Hymenoptera	Formicidae	Atta	scaffold	invertebrate
GCF_009176525.2	Contarinia nasturtii	Eukaryota	Metazoa	Arthropoda	Insecta	Diptera	Cecidomyiidae	Contarinia	scaffold	invertebrate
GCF_001298355.1	Papilio machaon	Eukaryota	Metazoa	Arthropoda	Insecta	Lepidoptera	Papilionidae	Papilio	scaffold	invertebrate
GCF_001465965.1	Polistes dominula	Eukaryota	Metazoa	Arthropoda	Insecta	Hymenoptera	Vespidae	Polistes	scaffold	invertebrate
GCF_000236325.1	Drosophila eugracilis	Eukaryota	Metazoa	Arthropoda	Insecta	Diptera	Drosophilidae	Drosophila	scaffold	invertebrate
GCF_003227715.1	Harpegnathos saltator	Eukaryota	Metazoa	Arthropoda	Insecta	Hymenoptera	Formicidae	Harpegnathos	scaffold	invertebrate
GCF_001594055.1	Trachymyrmex zeteki	Eukaryota	Metazoa	Arthropoda	Insecta	Hymenoptera	Formicidae	Trachymyrmex	scaffold	invertebrate
GCF_000956235.1	Wasmannia auropunctata	Eukaryota	Metazoa	Arthropoda	Insecta	Hymenoptera	Formicidae	Wasmannia	scaffold	invertebrate
GCF_000002075.1	Aplysia californica	Eukaryota	Metazoa	Mollusca	Gastropoda	Aplysiida	Aplysiidae	Aplysia	scaffold	invertebrate
GCF_000209185.1	Culex quinquefasciatus	Eukaryota	Metazoa	Arthropoda	Insecta	Diptera	Culicidae	Culex	scaffold	invertebrate
GCF_002443255.1	Varroa destructor	Eukaryota	Metazoa	Arthropoda	Arachnida	Mesostigmata	Varroidae	Varroa	scaffold	invertebrate
GCF_000671375.1	Centruroides sculpturatus	Eukaryota	Metazoa	Arthropoda	Arachnida	Scorpiones	Buthidae	Centruroides	scaffold	invertebrate
GCF_001263275.1	Habropoda laboriosa	Eukaryota	Metazoa	Arthropoda	Insecta	Hymenoptera	Apidae	Habropoda	scaffold	invertebrate
GCF_003640425.2	Galleria mellonella	Eukaryota	Metazoa	Arthropoda	Insecta	Lepidoptera	Pyralidae	Galleria	scaffold	invertebrate
GCF_000002995.3	Brugia malayi	Eukaryota	Metazoa	Nematoda	Chromadorea	Rhabditida	Onchocercidae	Brugia	scaffold	invertebrate
GCF_000326865.1	Helobdella robusta	Eukaryota	Metazoa	Annelida	Clitellata	Hirudinida	Glossiphoniidae	Helobdella	scaffold	invertebrate
GCF_000836215.1	Papilio polytes	Eukaryota	Metazoa	Arthropoda	Insecta	Lepidoptera	Papilionidae	Papilio	scaffold	invertebrate
GCF_000209225.1	Nematostella vectensis	Eukaryota	Metazoa	Cnidaria	Anthozoa	Actiniaria	Edwardsiidae	Nematostella	scaffold	invertebrate
GCF_011952275.1	Bombus vancouverensis nearcticus	Eukaryota	Metazoa	Arthropoda	Insecta	Hymenoptera	Apidae	Bombus	scaffold	invertebrate
GCF_000217595.1	Linepithema humile	Eukaryota	Metazoa	Arthropoda	Insecta	Hymenoptera	Formicidae	Linepithema	scaffold	invertebrate
GCF_000789215.1	Bactrocera dorsalis	Eukaryota	Metazoa	Arthropoda	Insecta	Diptera	Tephritidae	Bactrocera	scaffold	invertebrate
GCF_000005175.2	Drosophila mojavensis	Eukaryota	Metazoa	Arthropoda	Insecta	Diptera	Drosophilidae	Drosophila	scaffold	invertebrate
GCF_000524195.1	Echinococcus granulosus	Eukaryota	Metazoa	Platyhelminthes	Cestoda	Cyclophyllidea	Taeniidae	Echinococcus	scaffold	invertebrate
GCF_000327385.1	Lottia gigantea	Eukaryota	Metazoa	Mollusca	Gastropoda	Patellogastropoda	Lottidae	Lottia	scaffold	invertebrate
GCF_000236305.1	Drosophila rhopaloa	Eukaryota	Metazoa	Arthropoda	Insecta	Diptera	Drosophilidae	Drosophila	scaffold	invertebrate
GCF_000224215.1	Drosophila kikkawai	Eukaryota	Metazoa	Arthropoda	Insecta	Diptera	Drosophilidae	Drosophila	scaffold	invertebrate
GCF_003704095.1	Pocillopora damicornis	Eukaryota	Metazoa	Cnidaria	Anthozoa	Scleractinia	Pocilloporidae	Pocillopora	scaffold	invertebrate
GCF_003651465.1	Formica exsecta	Eukaryota	Metazoa	Arthropoda	Insecta	Hymenoptera	Formicidae	Formica	scaffold	invertebrate
GCF_010614865.1	Stegodyphus dumicola	Eukaryota	Metazoa	Arthropoda	Arachnida	Araneae	Eresidae	Stegodyphus	scaffold	invertebrate
GCF_000648655.2	Copidosoma floridanum	Eukaryota	Metazoa	Arthropoda	Insecta	Hymenoptera	Encyrtidae	Copidosoma	scaffold	invertebrate
GCF_000612105.2	Orussus abietinus	Eukaryota	Metazoa	Arthropoda	Insecta	Hymenoptera	Orussidae	Orussus	scaffold	invertebrate
GCF_000757685.1	Nilaparvata lugens	Eukaryota	Metazoa	Arthropoda	Insecta	Hemiptera	Delphacidae	Nilaparvata	scaffold	invertebrate
GCF_001186385.1	Diuraphis noxia	Eukaryota	Metazoa	Arthropoda	Insecta	Hemiptera	Aphididae	Diuraphis	scaffold	invertebrate
GCF_000184785.3	Apis florea	Eukaryota	Metazoa	Arthropoda	Insecta	Hymenoptera	Apidae	Apis	scaffold	invertebrate
GCF_001854935.1	Bemisia tabaci	Eukaryota	Metazoa	Arthropoda	Insecta	Hemiptera	Aleyrodidae	Bemisia	scaffold	invertebrate
GCF_001483705.1	Eufriesea mexicana	Eukaryota	Metazoa	Arthropoda	Insecta	Hymenoptera	Apidae	Eufriesea	scaffold	invertebrate
GCF_900239965.1	Bicyclus anynana	Eukaryota	Metazoa	Arthropoda	Insecta	Lepidoptera	Nymphalidae	Bicyclus	scaffold	invertebrate
GCF_000149515.1	Caenorhabditis remanei	Eukaryota	Metazoa	Nematoda	Chromadorea	Rhabditida	Rhabditidae	Caenorhabditis	scaffold	invertebrate
GCF_000715545.1	Opisthorchis viverrini	Eukaryota	Metazoa	Platyhelminthes	Trematoda	Opisthorchiida	Opisthorchiidae	Opisthorchis	scaffold	invertebrate
GCF_000006295.1	Pediculus humanus corporis	Eukaryota	Metazoa	Arthropoda	Insecta	Phthiraptera	Pediculidae	Pediculus	scaffold	invertebrate
GCF_000500325.1	Leptinotarsa decemlineata	Eukaryota	Metazoa	Arthropoda	Insecta	Coleoptera	Chrysomelidae	Leptinotarsa	scaffold	invertebrate
GCF_001594065.1	Cyphomyrmex costatus	Eukaryota	Metazoa	Arthropoda	Insecta	Hymenoptera	Formicidae	Cyphomyrmex	scaffold	invertebrate
GCF_000949405.1	Vollenhovia emeryi	Eukaryota	Metazoa	Arthropoda	Insecta	Hymenoptera	Formicidae	Vollenhovia	scaffold	invertebrate
GCF_000181795.1	Trichinella spiralis	Eukaryota	Metazoa	Nematoda	Enoplea	Trichinellida	Trichinellidae	Trichinella	scaffold	invertebrate
GCF_000003605.2	Saccoglossus kowalevskii	Eukaryota	Metazoa	Hemichordata	Enteropneusta	Enteropneusta	Harrimaniidae	Saccoglossus	scaffold	invertebrate
GCF_000188095.3	Bombus impatiens	Eukaryota	Metazoa	Arthropoda	Insecta	Hymenoptera	Apidae	Bombus	scaffold	invertebrate
GCF_001442555.1	Apis cerana	Eukaryota	Metazoa	Arthropoda	Insecta	Hymenoptera	Apidae	Apis	scaffold	invertebrate
GCF_003589595.1	Hyposmocoma kahamanoa	Eukaryota	Metazoa	Arthropoda	Insecta	Lepidoptera	Cosmopterigidae	Hyposmocoma	scaffold	invertebrate
GCF_000806365.1	Fopius arisanus	Eukaryota	Metazoa	Arthropoda	Insecta	Hymenoptera	Braconidae	Fopius	scaffold	invertebrate
GCF_001853355.1	Bactrocera latifrons	Eukaryota	Metazoa	Arthropoda	Insecta	Diptera	Tephritidae	Bactrocera	scaffold	invertebrate
GCF_001313835.1	Polistes canadensis	Eukaryota	Metazoa	Arthropoda	Insecta	Hymenoptera	Vespidae	Polistes	scaffold	invertebrate
GCF_000365465.2	Parasteatoda tepidariorum	Eukaryota	Metazoa	Arthropoda	Arachnida	Araneae	Theridiidae	Parasteatoda	scaffold	invertebrate
GCF_000371365.1	Musca domestica	Eukaryota	Metazoa	Arthropoda	Insecta	Diptera	Muscidae	Musca	scaffold	invertebrate
GCF_013357705.1	Chelonus insularis	Eukaryota	Metazoa	Arthropoda	Insecta	Hymenoptera	Braconidae	Chelonus	scaffold	invertebrate
GCF_000648675.2	Cimex lectularius	Eukaryota	Metazoa	Arthropoda	Insecta	Hemiptera	Cimicidae	Cimex	scaffold	invertebrate
GCF_000390285.2	Anoplophora glabripennis	Eukaryota	Metazoa	Arthropoda	Insecta	Coleoptera	Cerambycidae	Anoplophora	scaffold	invertebrate
GCF_003260585.2	Monomorium pharaonis	Eukaryota	Metazoa	Arthropoda	Insecta	Hymenoptera	Formicidae	Monomorium	scaffold	invertebrate
GCF_003987935.1	Bombyx mandarina	Eukaryota	Metazoa	Arthropoda	Insecta	Lepidoptera	Bombycidae	Bombyx	scaffold	invertebrate
GCF_000485595.1	Priapulus caudatus	Eukaryota	Metazoa	Priapulida	Priapulimorpha	Priapulimorphida	Priapulidae	Priapulus	scaffold	invertebrate
GCF_000090795.1	Amphimedon queenslandica	Eukaryota	Metazoa	Porifera	Demospongiae	Haplosclerida	Niphatidae	Amphimedon	scaffold	invertebrate
GCF_001654015.2	Drosophila navojoa	Eukaryota	Metazoa	Arthropoda	Insecta	Diptera	Drosophilidae	Drosophila	scaffold	invertebrate
GCF_000341935.1	Cephus cinctus	Eukaryota	Metazoa	Arthropoda	Insecta	Hymenoptera	Cephidae	Cephus	scaffold	invertebrate
GCF_000255335.1	Galendromus occidentalis	Eukaryota	Metazoa	Arthropoda	Arachnida	Mesostigmata	Phytoseiidae	Galendromus	scaffold	invertebrate
GCF_000503995.1	Ceratosolen solmsi marchali	Eukaryota	Metazoa	Arthropoda	Insecta	Hymenoptera	Agaonidae	Ceratosolen	scaffold	invertebrate
GCF_000507365.1	Necator americanus	Eukaryota	Metazoa	Nematoda	Chromadorea	Strongylida	Ancylostomatidae	Necator	scaffold	invertebrate
GCF_002042975.1	Orbicella faveolata	Eukaryota	Metazoa	Cnidaria	Anthozoa	Scleractinia	Merulinidae	Orbicella	scaffold	invertebrate
GCF_000696155.1	Zootermopsis nevadensis	Eukaryota	Metazoa	Arthropoda	Insecta	Blattodea	Termopsidae	Zootermopsis	scaffold	invertebrate
GCF_001313825.1	Dinoponera quadriceps	Eukaryota	Metazoa	Arthropoda	Insecta	Hymenoptera	Formicidae	Dinoponera	scaffold	invertebrate
GCF_004153925.1	Osmia bicornis bicornis	Eukaryota	Metazoa	Arthropoda	Insecta	Hymenoptera	Megachilidae	Osmia	scaffold	invertebrate
GCF_000599845.2	Trichogramma pretiosum	Eukaryota	Metazoa	Arthropoda	Insecta	Hymenoptera	Trichogrammatidae	Trichogramma	scaffold	invertebrate
GCF_000648695.1	Onthophagus taurus	Eukaryota	Metazoa	Arthropoda	Insecta	Coleoptera	Scarabaeidae	Onthophagus	scaffold	invertebrate
GCF_008802855.1	Photinus pyralis	Eukaryota	Metazoa	Arthropoda	Insecta	Coleoptera	Lampyridae	Photinus	scaffold	invertebrate
GCF_000236285.1	Drosophila bipectinata	Eukaryota	Metazoa	Arthropoda	Insecta	Diptera	Drosophilidae	Drosophila	scaffold	invertebrate
GCF_001687245.1	Rhagoletis zephyria	Eukaryota	Metazoa	Arthropoda	Insecta	Diptera	Tephritidae	Rhagoletis	scaffold	invertebrate
GCF_002217835.1	Drosophila obscura	Eukaryota	Metazoa	Arthropoda	Insecta	Diptera	Drosophilidae	Drosophila	scaffold	invertebrate
GCF_000696795.2	Halyomorpha halys	Eukaryota	Metazoa	Arthropoda	Insecta	Hemiptera	Pentatomidae	Halyomorpha	scaffold	invertebrate
GCF_000472105.1	Drosophila suzukii	Eukaryota	Metazoa	Arthropoda	Insecta	Diptera	Drosophilidae	Drosophila	scaffold	invertebrate
GCF_010583005.1	Odontomachus brunneus	Eukaryota	Metazoa	Arthropoda	Insecta	Hymenoptera	Formicidae	Odontomachus	scaffold	invertebrate
GCF_000224195.1	Drosophila elegans	Eukaryota	Metazoa	Arthropoda	Insecta	Diptera	Drosophilidae	Drosophila	scaffold	invertebrate
GCF_000005925.1	Drosophila willistoni	Eukaryota	Metazoa	Arthropoda	Insecta	Diptera	Drosophilidae	Drosophila	scaffold	invertebrate
GCF_000239435.1	Tetranychus urticae	Eukaryota	Metazoa	Arthropoda	Arachnida	Trombidiformes	Tetranychidae	Tetranychus	scaffold	invertebrate
GCF_001015335.1	Stomoxys calcitrans	Eukaryota	Metazoa	Arthropoda	Insecta	Diptera	Muscidae	Stomoxys	scaffold	invertebrate
GCF_004143615.1	Acropora millepora	Eukaryota	Metazoa	Cnidaria	Anthozoa	Scleractinia	Acroporidae	Acropora	scaffold	invertebrate
GCF_000355655.1	Dendroctonus ponderosae	Eukaryota	Metazoa	Arthropoda	Insecta	Coleoptera	Curculionidae	Dendroctonus	scaffold	invertebrate
GCF_003070985.1	Temnothorax curvispinosus	Eukaryota	Metazoa	Arthropoda	Insecta	Hymenoptera	Formicidae	Temnothorax	scaffold	invertebrate
GCF_003710045.1	Nomia melanderi	Eukaryota	Metazoa	Arthropoda	Insecta	Hymenoptera	Halictidae	Nomia	scaffold	invertebrate
GCF_000220905.1	Megachile rotundata	Eukaryota	Metazoa	Arthropoda	Insecta	Hymenoptera	Megachilidae	Megachile	scaffold	invertebrate
GCF_000572035.2	Microplitis demolitor	Eukaryota	Metazoa	Arthropoda	Insecta	Hymenoptera	Braconidae	Microplitis	scaffold	invertebrate
GCF_003789085.1	Penaeus vannamei	Eukaryota	Metazoa	Arthropoda	Malacostraca	Decapoda	Penaeidae	Penaeus	scaffold	invertebrate
GCF_002803265.2	Melanaphis sacchari	Eukaryota	Metazoa	Arthropoda	Insecta	Hemiptera	Aphididae	Melanaphis	scaffold	invertebrate
GCF_003013835.1	Diabrotica virgifera virgifera	Eukaryota	Metazoa	Arthropoda	Insecta	Coleoptera	Chrysomelidae	Diabrotica	scaffold	invertebrate
GCF_000475195.1	Diaphorina citri	Eukaryota	Metazoa	Arthropoda	Insecta	Hemiptera	Liviidae	Diaphorina	scaffold	invertebrate
GCF_000699065.1	Lucilia cuprina	Eukaryota	Metazoa	Arthropoda	Insecta	Diptera	Calliphoridae	Lucilia	scaffold	invertebrate
GCF_000836235.1	Papilio xuthus	Eukaryota	Metazoa	Arthropoda	Insecta	Lepidoptera	Papilionidae	Papilio	scaffold	invertebrate
GCF_000183805.2	Loa loa	Eukaryota	Metazoa	Nematoda	Chromadorea	Rhabditida	Onchocercidae	Loa	scaffold	invertebrate
GCF_000188075.2	Solenopsis invicta	Eukaryota	Metazoa	Arthropoda	Insecta	Hymenoptera	Formicidae	Solenopsis	scaffold	invertebrate
GCF_000143395.1	Atta cephalotes	Eukaryota	Metazoa	Arthropoda	Insecta	Hymenoptera	Formicidae	Atta	scaffold	invertebrate
GCF_009602425.1	Actinia tenebrosa	Eukaryota	Metazoa	Cnidaria	Anthozoa	Actiniaria	Actiniidae	Actinia	scaffold	invertebrate
GCF_000004095.1	Hydra vulgaris	Eukaryota	Metazoa	Cnidaria	Hydrozoa	Anthoathecata	Hydridae	Hydra	scaffold	invertebrate
GCF_000469605.1	Apis dorsata	Eukaryota	Metazoa	Arthropoda	Insecta	Hymenoptera	Apidae	Apis	scaffold	invertebrate
GCF_000517525.1	Limulus polyphemus	Eukaryota	Metazoa	Arthropoda	Merostomata	Xiphosura	Limulidae	Limulus	scaffold	invertebrate
GCF_000699045.2	Agrilus planipennis	Eukaryota	Metazoa	Arthropoda	Insecta	Coleoptera	Buprestidae	Agrilus	scaffold	invertebrate
GCF_000222465.1	Acropora digitifera	Eukaryota	Metazoa	Cnidaria	Anthozoa	Scleractinia	Acroporidae	Acropora	scaffold	invertebrate
GCF_002532875.1	Varroa jacobsoni	Eukaryota	Metazoa	Arthropoda	Arachnida	Mesostigmata	Varroidae	Varroa	scaffold	invertebrate
GCF_000591075.1	Eurytemora affinis	Eukaryota	Metazoa	Arthropoda	Hexanauplia	Calanoida	Temoridae	Eurytemora	scaffold	invertebrate
GCF_000151625.1	Bombyx mori	Eukaryota	Metazoa	Arthropoda	Insecta	Lepidoptera	Bombycidae	Bombyx	scaffold	invertebrate
GCF_000204515.1	Acromyrmex echinatior	Eukaryota	Metazoa	Arthropoda	Insecta	Hymenoptera	Formicidae	Acromyrmex	scaffold	invertebrate
GCF_011952255.1	Bombus vosnesenskii	Eukaryota	Metazoa	Arthropoda	Insecta	Hymenoptera	Apidae	Bombus	scaffold	invertebrate
GCF_012932325.1	Thrips palmi	Eukaryota	Metazoa	Arthropoda	Insecta	Thysanoptera	Thripidae	Thrips	scaffold	invertebrate
GCF_006496715.1	Aedes albopictus	Eukaryota	Metazoa	Arthropoda	Insecta	Diptera	Culicidae	Aedes	scaffold	invertebrate
GCF_011952205.1	Bombus bifarius	Eukaryota	Metazoa	Arthropoda	Insecta	Hymenoptera	Apidae	Bombus	scaffold	invertebrate
GCF_005281655.1	Nylanderia fulva	Eukaryota	Metazoa	Arthropoda	Insecta	Hymenoptera	Formicidae	Nylanderia	scaffold	invertebrate
GCF_001594115.1	Trachymyrmex septentrionalis	Eukaryota	Metazoa	Arthropoda	Insecta	Hymenoptera	Formicidae	Trachymyrmex	scaffold	invertebrate
GCF_000806345.1	Zeugodacus cucurbitae	Eukaryota	Metazoa	Arthropoda	Insecta	Diptera	Tephritidae	Zeugodacus	scaffold	invertebrate
GCF_001186105.1	Amyelois transitella	Eukaryota	Metazoa	Arthropoda	Insecta	Lepidoptera	Pyralidae	Amyelois	scaffold	invertebrate
GCF_002571385.1	Stylophora pistillata	Eukaryota	Metazoa	Cnidaria	Anthozoa	Scleractinia	Pocilloporidae	Stylophora	scaffold	invertebrate
GCF_002217175.1	Folsomia candida	Eukaryota	Metazoa	Arthropoda	Collembola	Entomobryomorpha	Isotomidae	Folsomia	scaffold	invertebrate
GCF_003426905.1	Ctenocephalides felis	Eukaryota	Metazoa	Arthropoda	Insecta	Siphonaptera	Pulicidae	Ctenocephalides	scaffold	invertebrate
GCF_001654025.1	Drosophila arizonae	Eukaryota	Metazoa	Arthropoda	Insecta	Diptera	Drosophilidae	Drosophila	scaffold	invertebrate
GCF_002891405.2	Cryptotermes secundus	Eukaryota	Metazoa	Arthropoda	Insecta	Blattodea	Kalotermitidae	Cryptotermes	scaffold	invertebrate
GCF_001263575.1	Neodiprion lecontei	Eukaryota	Metazoa	Arthropoda	Insecta	Hymenoptera	Diprionidae	Neodiprion	scaffold	invertebrate
GCF_000233415.1	Drosophila biarmipes	Eukaryota	Metazoa	Arthropoda	Insecta	Diptera	Drosophilidae	Drosophila	scaffold	invertebrate
GCF_011865705.1	Megalopta genalis	Eukaryota	Metazoa	Arthropoda	Insecta	Hymenoptera	Halictidae	Megalopta	scaffold	invertebrate
GCF_000330985.1	Plutella xylostella	Eukaryota	Metazoa	Arthropoda	Insecta	Lepidoptera	Plutellidae	Plutella	scaffold	invertebrate
GCF_000764305.1	Hyalella azteca	Eukaryota	Metazoa	Arthropoda	Malacostraca	Amphipoda	Hyalellidae	Hyalella	scaffold	invertebrate
GCF_900245975.1	Drosophila guanche	Eukaryota	Metazoa	Arthropoda	Insecta	Diptera	Drosophilidae	Drosophila	scaffold	invertebrate
GCF_000187915.1	Pogonomyrmex barbatus	Eukaryota	Metazoa	Arthropoda	Insecta	Hymenoptera	Formicidae	Pogonomyrmex	scaffold	invertebrate
GCF_001625305.1	Branchiostoma belcheri	Eukaryota	Metazoa	Chordata	Leptocardii	Amphioxiformes	Branchiostomidae	Branchiostoma	scaffold	invertebrate
GCF_004193835.1	Ostrinia furnacalis	Eukaryota	Metazoa	Arthropoda	Insecta	Lepidoptera	Crambidae	Ostrinia	scaffold	invertebrate
GCF_001652005.1	Ceratina calcarata	Eukaryota	Metazoa	Arthropoda	Insecta	Hymenoptera	Apidae	Ceratina	scaffold	invertebrate
GCF_001412515.2	Diachasma alloeum	Eukaryota	Metazoa	Arthropoda	Insecta	Hymenoptera	Braconidae	Diachasma	scaffold	invertebrate
GCF_011630105.1	Anneissia japonica	Eukaryota	Metazoa	Echinodermata	Crinoidea	Comatulida	Comatulidae	Anneissia	scaffold	invertebrate
GCF_001949145.1	Acanthaster planci	Eukaryota	Metazoa	Echinodermata	Asteroidea	Valvatida	Acanthasteridae	Acanthaster	scaffold	invertebrate
GCF_000220665.1	Drosophila ficusphila	Eukaryota	Metazoa	Arthropoda	Insecta	Diptera	Drosophilidae	Drosophila	scaffold	invertebrate
GCF_002113885.1	Mizuhopecten yessoensis	Eukaryota	Metazoa	Mollusca	Bivalvia	Pectinoida	Pectinidae	Mizuhopecten	scaffold	invertebrate
GCF_000262585.1	Manduca sexta	Eukaryota	Metazoa	Arthropoda	Insecta	Lepidoptera	Sphingidae	Manduca	scaffold	invertebrate
GCF_000457365.1	Biomphalaria glabrata	Eukaryota	Metazoa	Mollusca	Gastropoda	Basommatophora	Planorbidae	Biomphalaria	scaffold	invertebrate
GCF_002938995.1	Vanessa tameamea	Eukaryota	Metazoa	Arthropoda	Insecta	Lepidoptera	Nymphalidae	Vanessa	scaffold	invertebrate
GCF_000002235.5	Strongylocentrotus purpuratus	Eukaryota	Metazoa	Echinodermata	Echinoidea	Echinoida	Strongylocentrotidae	Strongylocentrotus	scaffold	invertebrate
GCF_002938485.1	Sitophilus oryzae	Eukaryota	Metazoa	Arthropoda	Insecta	Coleoptera	Curculionidae	Sitophilus	scaffold	invertebrate
GCF_001412225.1	Nicrophorus vespilloides	Eukaryota	Metazoa	Arthropoda	Insecta	Coleoptera	Silphidae	Nicrophorus	scaffold	invertebrate
GCF_000697945.2	Frankliniella occidentalis	Eukaryota	Metazoa	Arthropoda	Insecta	Thysanoptera	Thripidae	Frankliniella	scaffold	invertebrate
GCF_000344095.2	Athalia rosae	Eukaryota	Metazoa	Arthropoda	Insecta	Hymenoptera	Tenthredinidae	Athalia	scaffold	invertebrate
GCF_001856805.1	Pieris rapae	Eukaryota	Metazoa	Arthropoda	Insecta	Lepidoptera	Pieridae	Pieris	scaffold	invertebrate
GCF_003268045.1	Sipha flava	Eukaryota	Metazoa	Arthropoda	Insecta	Hemiptera	Aphididae	Sipha	scaffold	invertebrate
GCF_000699445.1	Schistosoma haematobium	Eukaryota	Metazoa	Platyhelminthes	Trematoda	Strigeidida	Schistosomatidae	Schistosoma	scaffold	invertebrate
GCF_002006095.1	Pseudomyrmex gracilis	Eukaryota	Metazoa	Arthropoda	Insecta	Hymenoptera	Formicidae	Pseudomyrmex	scaffold	invertebrate
GCF_000224235.1	Drosophila takahashii	Eukaryota	Metazoa	Arthropoda	Insecta	Diptera	Drosophilidae	Drosophila	scaffold	invertebrate
GCF_000347755.3	Ceratitis capitata	Eukaryota	Metazoa	Arthropoda	Insecta	Diptera	Tephritidae	Ceratitis	scaffold	invertebrate
GCF_000150275.1	Trichoplax adhaerens	Eukaryota	Metazoa	Placozoa	Trichoplacoidea	Trichoplacoidea	Trichoplacidae	Trichoplax	scaffold	invertebrate
GCF_000005155.2	Drosophila grimshawi	Eukaryota	Metazoa	Arthropoda	Insecta	Diptera	Drosophilidae	Drosophila	scaffold	invertebrate
GCF_001594075.1	Trachymyrmex cornetzi	Eukaryota	Metazoa	Arthropoda	Insecta	Hymenoptera	Formicidae	Trachymyrmex	scaffold	invertebrate
GCF_001039355.2	Lingula anatina	Eukaryota	Metazoa	Brachiopoda	Lingulata	Lingulida	Lingulidae	Lingula	scaffold	invertebrate
GCF_002156985.1	Helicoverpa armigera	Eukaryota	Metazoa	Arthropoda	Insecta	Lepidoptera	Noctuidae	Helicoverpa	scaffold	invertebrate
GCF_004010815.1	Aphis gossypii	Eukaryota	Metazoa	Arthropoda	Insecta	Hemiptera	Aphididae	Aphis	scaffold	invertebrate
GCF_000003815.1	Branchiostoma floridae	Eukaryota	Metazoa	Chordata	Leptocardii	Amphioxiformes	Branchiostomidae	Branchiostoma	scaffold	invertebrate
GCF_001188975.1	Bactrocera oleae	Eukaryota	Metazoa	Arthropoda	Insecta	Diptera	Tephritidae	Bactrocera	scaffold	invertebrate
GCF_001417965.1	Exaiptasia diaphana	Eukaryota	Metazoa	Cnidaria	Anthozoa	Actiniaria	Aiptasiidae	Exaiptasia	scaffold	invertebrate
GCF_000188695.1	Salpingoeca rosetta	Eukaryota	Fungi/Metazoa	Choanoflagellata	Choanoflagellata	Craspedida	Salpingoecidae	Salpingoeca	scaffold	invertebrate
GCF_001856785.1	Myzus persicae	Eukaryota	Metazoa	Arthropoda	Insecta	Hemiptera	Aphididae	Myzus	scaffold	invertebrate
GCF_001272555.1	Dufourea novaeangliae	Eukaryota	Metazoa	Arthropoda	Insecta	Hymenoptera	Halictidae	Dufourea	scaffold	invertebrate
GCF_002892825.2	Ixodes scapularis	Eukaryota	Metazoa	Arthropoda	Arachnida	Ixodida	Ixodidae	Ixodes	contig	invertebrate
GCF_003285975.2	Drosophila ananassae	Eukaryota	Metazoa	Arthropoda	Insecta	Diptera	Drosophilidae	Drosophila	contig	invertebrate
GCF_003285875.2	Drosophila novamexicana	Eukaryota	Metazoa	Arthropoda	Insecta	Diptera	Drosophilidae	Drosophila	contig	invertebrate
GCF_001937115.1	Aethina tumida	Eukaryota	Metazoa	Arthropoda	Insecta	Coleoptera	Nitidulidae	Aethina	contig	invertebrate
GCF_003285735.1	Drosophila virilis	Eukaryota	Metazoa	Arthropoda	Insecta	Diptera	Drosophilidae	Drosophila	contig	invertebrate
GCF_003286155.1	Drosophila erecta	Eukaryota	Metazoa	Arthropoda	Insecta	Diptera	Drosophilidae	Drosophila	contig	invertebrate
GCF_012274295.1	Osmia lignaria	Eukaryota	Metazoa	Arthropoda	Insecta	Hymenoptera	Megachilidae	Osmia	contig	invertebrate
GCF_003285725.1	Scaptodrosophila lebanonensis	Eukaryota	Metazoa	Arthropoda	Insecta	Diptera	Drosophilidae	Scaptodrosophila	contig	invertebrate
GCF_004324835.1	Dendronephthya gigantea	Eukaryota	Metazoa	Cnidaria	Anthozoa	Alcyonacea	Nephtheidae	Dendronephthya	contig	invertebrate
GCF_003286085.1	Drosophila persimilis	Eukaryota	Metazoa	Arthropoda	Insecta	Diptera	Drosophilidae	Drosophila	contig	invertebrate
GCF_002093755.1	Drosophila serrata	Eukaryota	Metazoa	Arthropoda	Insecta	Diptera	Drosophilidae	Drosophila	contig	invertebrate
GCF_003285905.1	Drosophila hydei	Eukaryota	Metazoa	Arthropoda	Insecta	Diptera	Drosophilidae	Drosophila	contig	invertebrate
GCF_000146045.2	Saccharomyces cerevisiae	Eukaryota	Fungi	Ascomycota	Saccharomycetes	Saccharomycetales	Saccharomycetaceae	Saccharomyces	complete genome	invertebrate
GCF_000226095.1	Thermothelomyces thermophilus	Eukaryota	Fungi	Ascomycota	Sordariomycetes	Sordariales	Chaetomiaceae	Thermothelomyces	complete genome	invertebrate
GCF_000182925.2	Neurospora classa	Eukaryota	Fungi	Ascomycota	Sordariomycetes	Sordariales	Sordariaceae	Neurospora	chromosome	invertebrate
GCF_000002655.1	Aspergillus fumigatus	Eukaryota	Fungi	Ascomycota	Eurotiomycetes	Eurotiales	Aspergillaceae	Aspergillus	chromosome	invertebrate
GCF_000002495.2	Pyricularia oryzae	Eukaryota	Fungi	Ascomycota	Sordariomycetes	Magnaporthales	Pyriculariaceae	Pyricularia	chromosome	invertebrate
GCF_000219625.1	Zymoseptoria tritici	Eukaryota	Fungi	Ascomycota	Dothideomycetes	Mycosphaerellales	Mycosphaerellaceae	Zymoseptoria	chromosome	invertebrate
GCF_000240135.3	Fusarium graminearum	Eukaryota	Fungi	Ascomycota	Sordariomycetes	Hypocreales	Nectriaceae	Fusarium	chromosome	invertebrate
GCF_001653235.2	Pochonia chlamydosporia	Eukaryota	Fungi	Ascomycota	Sordariomycetes	Hypocreales	Clavicipitaceae	Pochonia	chromosome	invertebrate
GCF_000002945.1	Schizosaccharomyces pombe	Eukaryota	Fungi	Ascomycota	Schizosaccharomycetes	Schizosaccharomycetales	Schizosaccharomycetaceae	Schizosaccharomyces	chromosome	invertebrate
